# Supplementary material for: Assessing hearing by measuring heartbeat: The effect of sound level
Source: PLoS One. 2019 Feb 28;14(2):e0212940. doi: 10.1371/journal.pone.0212940 (PMC6394942; doi:10.1371/journal.pone.0212940)
Supplement: S2 Dataset — (XLSX) [file pone.0212940.s004.xlsx]

## Sheet: inter-beat intervals 
subject	stimulus	time	trial	beat1to2	beat3to5
1	1	0	1	-1.66089e-14	-1.66089e-14
1	1	0	2	0	0
1	1	0	3	-6.57252e-15	-6.57252e-15
1	1	0	4	0	0
1	1	0	5	0	0
1	1	0	6	0	0				Stimulus:	1: 15 dB
1	1	0	7	0	0					2:40 dB
1	1	0	8	-4.17444e-15	-4.17444e-15					3: 65 dB
1	1	0	9	7.81597e-15	7.81597e-15					4: 90 dB
1	1	0	10	0	0
2	1	0	1	-3.81917e-15	-3.81917e-15				time:	1: post-stimulus
2	1	0	2	-7.81597e-15	-7.81597e-15					0: pre stimulus
2	1	0	3	1.13687e-14	1.13687e-14				trial:	10 trials (epochs) collected per stimulus level
2	1	0	4	-2.23821e-14	-2.23821e-14				beat1to2:	first two post-stimulus Inter-beat intervals averaged
2	1	0	5	-1.5099e-14	-1.5099e-14				beat3to5:	post-stimulus beats 3 to 5 averaged
2	1	0	6	-9.23706e-15	-9.23706e-15
2	1	0	7	-1.35003e-14	-1.35003e-14
2	1	0	8	7.4607e-15	7.4607e-15
2	1	0	9	-1.42109e-14	-1.42109e-14
2	1	0	10	3.64153e-15	3.64153e-15
3	1	0	1	1.88294e-14	1.88294e-14
3	1	0	2	0	0
3	1	0	3	1.77636e-14	1.77636e-14
3	1	0	4	-2.31037e-14	-2.31037e-14
3	1	0	5	1.24345e-14	1.24345e-14
3	1	0	6	4.10783e-15	4.10783e-15
3	1	0	7	-5.86198e-15	-5.86198e-15
3	1	0	8	4.26326e-15	4.26326e-15
3	1	0	9	0	0
3	1	0	10	-4.61853e-15	-4.61853e-15
4	1	0	1	9.23706e-15	9.23706e-15
4	1	0	2	8.52651e-15	8.52651e-15
4	1	0	3	1.32783e-14	1.32783e-14
4	1	0	4	2.35367e-15	2.35367e-15
4	1	0	5	-4.52971e-15	-4.52971e-15
4	1	0	6	0	0
4	1	0	7	2.38032e-14	2.38032e-14
4	1	0	8	-2.13163e-15	-2.13163e-15
4	1	0	9	-1.34626e-14	-1.34626e-14
4	1	0	10	-6.75016e-15	-6.75016e-15
5	1	0	1	0	0
5	1	0	2	2.4869e-15	2.4869e-15
5	1	0	3	-4.9738e-15	-4.9738e-15
5	1	0	4	-7.81597e-15	-7.81597e-15
5	1	0	5	0	0
5	1	0	6	1.27898e-14	1.27898e-14
5	1	0	7	0	0
5	1	0	8	8.17124e-15	8.17124e-15
5	1	0	9	1.63425e-14	1.63425e-14
5	1	0	10	-9.9476e-15	-9.9476e-15
6	1	0	1	5.4623e-15	5.4623e-15
6	1	0	2	-5.68434e-15	-5.68434e-15
6	1	0	3	-2.84217e-15	-2.84217e-15
6	1	0	4	0	0
6	1	0	5	0	0
6	1	0	6	6.03961e-15	6.03961e-15
6	1	0	7	7.88258e-15	7.88258e-15
6	1	0	8	5.32907e-15	5.32907e-15
6	1	0	9	1.35891e-14	1.35891e-14
6	1	0	10	1.38556e-14	1.38556e-14
7	1	0	1	-1.3034e-14	-1.3034e-14
7	1	0	2	2.30926e-15	2.30926e-15
7	1	0	3	2.30926e-15	2.30926e-15
7	1	0	4	8.34888e-15	8.34888e-15
7	1	0	5	-4.35207e-15	-4.35207e-15
7	1	0	6	2.66454e-15	2.66454e-15
7	1	0	7	-4.79616e-15	-4.79616e-15
7	1	0	8	0	0
7	1	0	9	-4.44089e-15	-4.44089e-15
7	1	0	10	-4.79616e-15	-4.79616e-15
8	1	0	1	2.72005e-15	2.72005e-15
8	1	0	2	1.60982e-16	1.60982e-16
8	1	0	3	-5.26246e-15	-5.26246e-15
8	1	0	4	-4.70735e-15	-4.70735e-15
8	1	0	5	7.37188e-15	7.37188e-15
8	1	0	6	2.66454e-15	2.66454e-15
8	1	0	7	0	0
8	1	0	8	0	0
8	1	0	9	-4.79616e-15	-4.79616e-15
8	1	0	10	0	0
9	1	0	1	1.52767e-14	1.52767e-14
9	1	0	2	-4.84636e-15	-4.84636e-15
9	1	0	3	1.54543e-14	1.54543e-14
9	1	0	4	-7.23865e-15	-7.23865e-15
9	1	0	5	7.99361e-15	7.99361e-15
9	1	0	6	5.15143e-15	5.15143e-15
9	1	0	7	-2.84217e-15	-2.84217e-15
9	1	0	8	0	0
9	1	0	9	0	0
9	1	0	10	-1.02141e-14	-1.02141e-14
10	1	0	1	2.62013e-15	2.62013e-15
10	1	0	2	-8.26006e-15	-8.26006e-15
10	1	0	3	2.4869e-15	2.4869e-15
10	1	0	4	1.03029e-14	1.03029e-14
10	1	0	5	5.15143e-15	5.15143e-15
10	1	0	6	-1.32339e-14	-1.32339e-14
10	1	0	7	0	0
10	1	0	8	2.57572e-15	2.57572e-15
10	1	0	9	4.9849e-15	4.9849e-15
10	1	0	10	5.28466e-15	5.28466e-15
11	1	0	1	-8.65974e-15	-8.65974e-15
11	1	0	2	-8.17124e-15	-8.17124e-15
11	1	0	3	1.82965e-14	1.82965e-14
11	1	0	4	2.4869e-15	2.4869e-15
11	1	0	5	-1.02807e-14	-1.02807e-14
11	1	0	6	0	0
11	1	0	7	7.19425e-15	7.19425e-15
11	1	0	8	-1.36335e-14	-1.36335e-14
11	1	0	9	0	0
11	1	0	10	-1.46771e-14	-1.46771e-14
12	1	0	1	9.63674e-15	9.63674e-15
12	1	0	2	9.63674e-15	9.63674e-15
12	1	0	3	1.47438e-14	1.47438e-14
12	1	0	4	-1.72973e-14	-1.72973e-14
12	1	0	5	0	0
12	1	0	6	-7.60503e-15	-7.60503e-15
12	1	0	7	2.66454e-15	2.66454e-15
12	1	0	8	-1.03917e-14	-1.03917e-14
12	1	0	9	2.39808e-15	2.39808e-15
12	1	0	10	-5.06262e-15	-5.06262e-15
13	1	0	1	-1.84741e-14	-1.84741e-14
13	1	0	2	0	0
13	1	0	3	-8.08242e-15	-8.08242e-15
13	1	0	4	4.9738e-15	4.9738e-15
13	1	0	5	-3.9968e-15	-3.9968e-15
13	1	0	6	-1.1946e-14	-1.1946e-14
13	1	0	7	0	0
13	1	0	8	-1.53655e-14	-1.53655e-14
13	1	0	9	0	0
13	1	0	10	1.58984e-14	1.58984e-14
14	1	0	1	0	0
14	1	0	2	2.05169e-14	2.05169e-14
14	1	0	3	6.57252e-15	6.57252e-15
14	1	0	4	2.10942e-15	2.10942e-15
14	1	0	5	4.9738e-15	4.9738e-15
14	1	0	6	0	0
14	1	0	7	0	0
14	1	0	8	-4.70735e-15	-4.70735e-15
14	1	0	9	0	0
14	1	0	10	0	0
15	1	0	1	2.30926e-15	2.30926e-15
15	1	0	2	0	0
15	1	0	3	-1.06581e-14	-1.06581e-14
15	1	0	4	0	0
15	1	0	5	4.70735e-15	4.70735e-15
15	1	0	6	-3.9968e-15	-3.9968e-15
15	1	0	7	1.33227e-16	1.33227e-16
15	1	0	8	2.13607e-14	2.13607e-14
15	1	0	9	0	0
15	1	0	10	2.22045e-15	2.22045e-15
16	1	0	1	9.9476e-15	9.9476e-15
16	1	0	2	1.02585e-14	1.02585e-14
16	1	0	3	-7.53286e-15	-7.53286e-15
16	1	0	4	-1.35003e-14	-1.35003e-14
16	1	0	5	0	0
16	1	0	6	0	0
16	1	0	7	-9.81437e-15	-9.81437e-15
16	1	0	8	5.06262e-15	5.06262e-15
16	1	0	9	-1.19016e-14	-1.19016e-14
16	1	0	10	-2.5091e-15	-2.5091e-15
17	1	0	1	-4.26326e-15	-4.26326e-15
17	1	0	2	-2.13163e-15	-2.13163e-15
17	1	0	3	2.13163e-15	2.13163e-15
17	1	0	4	-4.70735e-15	-4.70735e-15
17	1	0	5	-4.04121e-15	-4.04121e-15
17	1	0	6	0	0
17	1	0	7	2.26485e-15	2.26485e-15
17	1	0	8	-8.70415e-15	-8.70415e-15
17	1	0	9	2.24265e-15	2.24265e-15
17	1	0	10	0	0
18	1	0	1	7.4607e-15	7.4607e-15
18	1	0	2	-4.61853e-15	-4.61853e-15
18	1	0	3	1.19016e-14	1.19016e-14
18	1	0	4	1.03029e-14	1.03029e-14
18	1	0	5	4.61853e-15	4.61853e-15
18	1	0	6	0	0
18	1	0	7	4.08562e-15	4.08562e-15
18	1	0	8	-2.66454e-15	-2.66454e-15
18	1	0	9	-2.25597e-14	-2.25597e-14
18	1	0	10	-2.30926e-15	-2.30926e-15
19	1	0	1	-3.37508e-15	-3.37508e-15
19	1	0	2	0	0
19	1	0	3	-9.76996e-15	-9.76996e-15
19	1	0	4	-3.37508e-15	-3.37508e-15
19	1	0	5	-6.42819e-15	-6.42819e-15
19	1	0	6	0	0
19	1	0	7	9.76996e-15	9.76996e-15
19	1	0	8	-3.73035e-15	-3.73035e-15
19	1	0	9	0	0
19	1	0	10	0	0
20	1	0	1	1.35003e-14	1.35003e-14
20	1	0	2	1.26121e-14	1.26121e-14
20	1	0	3	-6.75016e-15	-6.75016e-15
20	1	0	4	-4.9738e-15	-4.9738e-15
20	1	0	5	1.81188e-14	1.81188e-14
20	1	0	6	-7.01661e-15	-7.01661e-15
20	1	0	7	0	0
20	1	0	8	5.14588e-15	5.14588e-15
20	1	0	9	-7.19425e-15	-7.19425e-15
20	1	0	10	4.75175e-15	4.75175e-15
21	1	0	1	0	0
21	1	0	2	-5.77316e-15	-5.77316e-15
21	1	0	3	2.75335e-15	2.75335e-15
21	1	0	4	2.66454e-15	2.66454e-15
21	1	0	5	-9.76996e-15	-9.76996e-15
21	1	0	6	4.79616e-15	4.79616e-15
21	1	0	7	-5.15143e-15	-5.15143e-15
21	1	0	8	0	0
21	1	0	9	-2.66454e-15	-2.66454e-15
21	1	0	10	9.59233e-15	9.59233e-15
22	1	0	1	0	0
22	1	0	2	2.44249e-15	2.44249e-15
22	1	0	3	-9.9476e-15	-9.9476e-15
22	1	0	4	5.41789e-15	5.41789e-15
22	1	0	5	2.4869e-15	2.4869e-15
22	1	0	6	-2.75335e-15	-2.75335e-15
22	1	0	7	-7.41629e-15	-7.41629e-15
22	1	0	8	1.06581e-14	1.06581e-14
22	1	0	9	2.84217e-15	2.84217e-15
22	1	0	10	0	0
23	1	0	1	0	0
23	1	0	2	0	0
23	1	0	3	-5.68434e-15	-5.68434e-15
23	1	0	4	-8.07687e-15	-8.07687e-15
23	1	0	5	0	0
23	1	0	6	5.34572e-15	5.34572e-15
23	1	0	7	-1.09246e-14	-1.09246e-14
23	1	0	8	-1.12799e-14	-1.12799e-14
23	1	0	9	8.17124e-15	8.17124e-15
23	1	0	10	-2.84217e-15	-2.84217e-15
24	1	0	1	-1.11022e-14	-1.11022e-14
24	1	0	2	5.28466e-15	5.28466e-15
24	1	0	3	-5.24025e-15	-5.24025e-15
24	1	0	4	-4.9738e-15	-4.9738e-15
24	1	0	5	2.77556e-15	2.77556e-15
24	1	0	6	0	0
24	1	0	7	8.00471e-15	8.00471e-15
24	1	0	8	-1.09246e-14	-1.09246e-14
24	1	0	9	-1.08358e-14	-1.08358e-14
24	1	0	10	-5.50671e-15	-5.50671e-15
25	1	0	1	0	0
25	1	0	2	2.27374e-14	2.27374e-14
25	1	0	3	-1.19016e-14	-1.19016e-14
25	1	0	4	-7.86038e-15	-7.86038e-15
25	1	0	5	0	0
25	1	0	6	-7.23865e-15	-7.23865e-15
25	1	0	7	0	0
25	1	0	8	0	0
25	1	0	9	0	0
25	1	0	10	-1.15463e-14	-1.15463e-14
26	1	0	1	5.32907e-15	5.32907e-15
26	1	0	2	-2.30926e-15	-2.30926e-15
26	1	0	3	0	0
26	1	0	4	-8.08242e-15	-8.08242e-15
26	1	0	5	-8.17124e-15	-8.17124e-15
26	1	0	6	-7.7105e-15	-7.7105e-15
26	1	0	7	-5.50671e-15	-5.50671e-15
26	1	0	8	-7.99361e-15	-7.99361e-15
26	1	0	9	-1.10134e-14	-1.10134e-14
26	1	0	10	5.59552e-15	5.59552e-15
27	1	0	1	5.06262e-15	5.06262e-15
27	1	0	2	9.59233e-15	9.59233e-15
27	1	0	3	0	0
27	1	0	4	7.4829e-15	7.4829e-15
27	1	0	5	-1.9762e-15	-1.9762e-15
27	1	0	6	0	0
27	1	0	7	-2.84217e-15	-2.84217e-15
27	1	0	8	1.08968e-14	1.08968e-14
27	1	0	9	2.75335e-15	2.75335e-15
27	1	0	10	-4.9738e-15	-4.9738e-15
1	1	1	1	-3.84615	-4.72599
1	1	1	2	-3.60983	0.102407
1	1	1	3	-2.22222	-4.69136
1	1	1	4	7.92779	-0.313972
1	1	1	5	4.23323	1.97018
1	1	1	6	4.03963	3.9126
1	1	1	7	1.34069	-2.2082
1	1	1	8	11.6637	12.1157
1	1	1	9	9.15493	5.92723
1	1	1	10	-3.72168	-0.21575
2	1	1	1	2.5641	5.00611
2	1	1	2	-7.45614	0.584795
2	1	1	3	-12.5874	-2.97203
2	1	1	4	-5.62081	-4.36242
2	1	1	5	-1.75585	-6.07581
2	1	1	6	-6.62651	-7.0568
2	1	1	7	0.352113	-7.86385
2	1	1	8	1.89983	5.92976
2	1	1	9	8.88672	-14.7135
2	1	1	10	6.03448	-1.43678
3	1	1	1	1.61565	3.1746
3	1	1	2	-2.40864	-1.16279
3	1	1	3	-22.0322	10.664
3	1	1	4	11.3173	15.6463
3	1	1	5	29.7327	17.2977
3	1	1	6	0.175747	6.91271
3	1	1	7	1.48976	11.7318
3	1	1	8	-4.30862	-0.801603
3	1	1	9	13.4615	3.84615
3	1	1	10	9.69388	7.48299
4	1	1	1	7.21868	9.69568
4	1	1	2	-9.84405	0.71475
4	1	1	3	-5.01969	1.37795
4	1	1	4	1.33843	3.25048
4	1	1	5	2.16573	-1.75769
4	1	1	6	2.44361	-7.89474
4	1	1	7	2.07101	3.5503
4	1	1	8	0.961538	-7.05128
4	1	1	9	1.0101	-5.72391
4	1	1	10	2.6694	5.40726
5	1	1	1	-11.0629	11.3521
5	1	1	2	9.5815	9.76505
5	1	1	3	-2.51572	-4.61216
5	1	1	4	35.0649	12.5541
5	1	1	5	-6.25	-2.18927
5	1	1	6	7.63889	3.39506
5	1	1	7	25.8907	12.4307
5	1	1	8	7.14286	10.1695
5	1	1	9	-13.5514	-15.5763
5	1	1	10	-5.15351	2.33918
6	1	1	1	2.97767	0.496278
6	1	1	2	0.877193	6.09858
6	1	1	3	-3.125	4.58333
6	1	1	4	-0.4914	3.1941
6	1	1	5	0.845411	1.0467
6	1	1	6	-2.70619	1.37457
6	1	1	7	2.68949	3.09698
6	1	1	8	3.23383	5.3068
6	1	1	9	3.65854	1.21951
6	1	1	10	3.59801	9.59471
7	1	1	1	-5.32544	-0.723208
7	1	1	2	-1.97095	-3.18119
7	1	1	3	6.18557	4.46735
7	1	1	4	10.0703	18.267
7	1	1	5	1.5	0.333333
7	1	1	6	-0.214592	8.72675
7	1	1	7	-7.12743	0.791937
7	1	1	8	-6.32054	1.58014
7	1	1	9	-8.5	-3.33333
7	1	1	10	4.07725	-0.9299
8	1	1	1	-2.96053	4.53216
8	1	1	2	-1.44766	0.593912
8	1	1	3	-2.8436	8.60979
8	1	1	4	0.422833	-0.281889
8	1	1	5	4.5354	6.93215
8	1	1	6	-8.78378	2.85285
8	1	1	7	17.2457	19.5203
8	1	1	8	12.2931	7.56501
8	1	1	9	0.656455	6.85631
8	1	1	10	1.66667	1.11111
9	1	1	1	-5.11364	7.19697
9	1	1	2	3.01648e-13	-2.53623
9	1	1	3	-1.84758	2.77136
9	1	1	4	-3.06122	3.55253
9	1	1	5	1.0274	3.50076
9	1	1	6	3.0445	3.0445
9	1	1	7	0.77951	6.53304
9	1	1	8	-1.04167	4.16667
9	1	1	9	1.21681	-0.442478
9	1	1	10	3.00926	3.00926
10	1	1	1	-1.06635	3.87046
10	1	1	2	-3.94089	0.574713
10	1	1	3	1.65485	2.44287
10	1	1	4	-0.700935	-0.311526
10	1	1	5	4.97573	6.79612
10	1	1	6	-6.3981	5.84518
10	1	1	7	5.03686	11.3841
10	1	1	8	-4.5977	1.53257
10	1	1	9	-1.54867	-5.23599
10	1	1	10	0.7109	-0.0789889
11	1	1	1	3.68957	4.74979
11	1	1	2	4.16667	1.5873
11	1	1	3	6.7217	1.02201
11	1	1	4	-1.1236	0.749064
11	1	1	5	-2.0979	-0.543901
11	1	1	6	-5.09259	1.85185
11	1	1	7	-6.87361	-9.09091
11	1	1	8	6.09756	5.69106
11	1	1	9	6.64336	10.7226
11	1	1	10	-1.98238	4.25844
12	1	1	1	-8.63229	5.38117
12	1	1	2	-4.09483	3.80747
12	1	1	3	-3.97351	5.22443
12	1	1	4	-13.6971	-9.42836
12	1	1	5	-8.24176	-2.5641
12	1	1	6	2.50569	-2.42976
12	1	1	7	8.94495	12.0031
12	1	1	8	5.7243	6.69782
12	1	1	9	9.13978	7.52688
12	1	1	10	0.928074	2.86156
13	1	1	1	-1.4658	-2.55157
13	1	1	2	1.19048	9.12698
13	1	1	3	-9.25267	-6.88019
13	1	1	4	20.5821	36.1746
13	1	1	5	8.25688	7.95107
13	1	1	6	2.37258	4.86233
13	1	1	7	1.88356	1.0274
13	1	1	8	2.6087	2.6087
13	1	1	9	-1.42617	2.06935
13	1	1	10	4.01786	5.65476
14	1	1	1	-1.68539	2.99625
14	1	1	2	-2.49538	-0.492914
14	1	1	3	2	4.33333
14	1	1	4	1.94175	-3.66485e-13
14	1	1	5	13.9309	18.7905
14	1	1	6	-1.52964	1.97578
14	1	1	7	-4.45545	-0.330033
14	1	1	8	-2.40084	0.556715
14	1	1	9	2.3622	2.3622
14	1	1	10	2.62646	-5.31777
15	1	1	1	4.45545	1.32013
15	1	1	2	4.91968	1.07095
15	1	1	3	-2.80464	0.580271
15	1	1	4	1.92308	1.28205
15	1	1	5	-2.36686	3.22156
15	1	1	6	-7.52788	-3.34572
15	1	1	7	4.32331	0.56391
15	1	1	8	-4.44015	-1.5444
15	1	1	9	-3.84615	-0.562852
15	1	1	10	-3.6965	2.78859
16	1	1	1	0.555556	5.55556
16	1	1	2	1.83066	6.02593
16	1	1	3	-2.61959	7.44115
16	1	1	4	4.91607	13.5092
16	1	1	5	-3.22581	-0.15361
16	1	1	6	-6.11111	6.2963
16	1	1	7	2.87611	1.76991
16	1	1	8	3.7844	7.4159
16	1	1	9	-0.106838	-1.35328
16	1	1	10	2.97483	2.97483
17	1	1	1	3.53053	6.2341
17	1	1	2	1.25261	-2.92276
17	1	1	3	13.963	2.6694
17	1	1	4	0.282486	4.2059
17	1	1	5	-0.547445	-3.28467
17	1	1	6	8.10811	0.3861
17	1	1	7	4.9505	0.660066
17	1	1	8	2.73973	0.456621
17	1	1	9	7.35586	-5.23526
17	1	1	10	13.1579	13.6842
18	1	1	1	-4.97738	1.80995
18	1	1	2	0.886918	-3.17812
18	1	1	3	-5.78158	-2.56959
18	1	1	4	4.06977	11.2403
18	1	1	5	2.50569	1.36674
18	1	1	6	-2.39726	1.59817
18	1	1	7	-0.677201	1.95636
18	1	1	8	3.80835	3.6036
18	1	1	9	-0.10917	2.98399
18	1	1	10	-3.05011	-4.13943
19	1	1	1	9.28144	7.78443
19	1	1	2	-0.205761	1.28029
19	1	1	3	2.02605	1.30246
19	1	1	4	12.2527	9.08168
19	1	1	5	-3.04606	0.544824
19	1	1	6	4.61285	8.45689
19	1	1	7	0.896861	2.64076
19	1	1	8	10.9399	5.8038
19	1	1	9	1.35135	-0.900901
19	1	1	10	-3.4965	2.0979
20	1	1	1	-16.221	-16.221
20	1	1	2	-0.447427	2.90828
20	1	1	3	-1.11562	-1.28465
20	1	1	4	-7.15884	7.75541
20	1	1	5	-3.68852	-5.7377
20	1	1	6	-8.94737	3.15789
20	1	1	7	3.57143	-3.06122
20	1	1	8	-5.96847	5.48048
20	1	1	9	7.6087	0.362319
20	1	1	10	1.7316	-2.5974
21	1	1	1	7.51295	3.19516
21	1	1	2	-1.80879	-0.516796
21	1	1	3	7.48219	6.0966
21	1	1	4	6.13208	0.628931
21	1	1	5	-5.44872	-1.35328
21	1	1	6	1.81237	-1.91898
21	1	1	7	3.64465	3.265
21	1	1	8	-7.46753	-3.3189
21	1	1	9	3.67171	3.67171
21	1	1	10	-3.59477	2.75962
22	1	1	1	-3.6643	-1.10323
22	1	1	2	2.51799	-2.8777
22	1	1	3	-3.93258	-2.99625
22	1	1	4	-3.61446	2.40964
22	1	1	5	-0.119617	5.26316
22	1	1	6	5.91133	5.50082
22	1	1	7	-2.77778	-9.72222
22	1	1	8	16.3522	7.96646
22	1	1	9	8.5044	31.9648
22	1	1	10	-13.486	-15.1824
23	1	1	1	-6.25	1.66667
23	1	1	2	0.26738	-2.40642
23	1	1	3	3.28947	1.31579
23	1	1	4	1.58151	1.37875
23	1	1	5	5.625	2.91667
23	1	1	6	-5.86035	5.56941
23	1	1	7	-0.371287	-0.990099
23	1	1	8	3.68957	5.59796
23	1	1	9	-0.609756	2.84553
23	1	1	10	-5.19324	-5.39452
24	1	1	1	-1.60891	8.08581
24	1	1	2	-5.81395	-2.32558
24	1	1	3	-5.50239	-7.49601
24	1	1	4	7.6555	-1.11643
24	1	1	5	-3.6215	-4.20561
24	1	1	6	4.91607	1.1191
24	1	1	7	-5.56901	1.69492
24	1	1	8	0	2.05761
24	1	1	9	1.5625	3.36538
24	1	1	10	-7.92683	-6.72055e-13
25	1	1	1	5.71429	8.57143
25	1	1	2	-7.31293	-1.64399
25	1	1	3	-4.46429	-3.27381
25	1	1	4	5.9246	-0.658288
25	1	1	5	6.54206	3.42679
25	1	1	6	-2.32358	-2.46701
25	1	1	7	11.4232	1.74782
25	1	1	8	-0.172117	-1.31956
25	1	1	9	-0.0822368	-1.58991
25	1	1	10	1.05448	4.56942
26	1	1	1	-3.30189	-2.90881
26	1	1	2	-9.30788	-0.159109
26	1	1	3	-4.44712	0.560897
26	1	1	4	4.36893	1.53722
26	1	1	5	2.18978	1.37875
26	1	1	6	-4.29234	-2.9389
26	1	1	7	5.26316	6.51629
26	1	1	8	-1.45985	0.162206
26	1	1	9	4.57921	10.9736
26	1	1	10	10.3491	4.32253
27	1	1	1	-3.58744	-5.08221
27	1	1	2	-3.01724	-5.17241
27	1	1	3	1.2035	-1.89643
27	1	1	4	-2.3702	5.34236
27	1	1	5	-1.16279	-6.97674
27	1	1	6	11.1111	7.48792
27	1	1	7	2.00472	1.02201
27	1	1	8	-4.58937	3.46216
27	1	1	9	-1.46396	-11.4114
27	1	1	10	0.348028	0.154679
1	2	0	1	1.78524e-14	1.78524e-14
1	2	0	2	1.40332e-14	1.40332e-14
1	2	0	3	1.74083e-14	1.74083e-14
1	2	0	4	1.35003e-14	1.35003e-14
1	2	0	5	0	0
1	2	0	6	0	0
1	2	0	7	0	0
1	2	0	8	0	0
1	2	0	9	0	0
1	2	0	10	3.55271e-15	3.55271e-15
2	2	0	1	4.61853e-15	4.61853e-15
2	2	0	2	-8.52651e-15	-8.52651e-15
2	2	0	3	3.90799e-15	3.90799e-15
2	2	0	4	1.83853e-14	1.83853e-14
2	2	0	5	9.76996e-15	9.76996e-15
2	2	0	6	3.90799e-15	3.90799e-15
2	2	0	7	1.13687e-14	1.13687e-14
2	2	0	8	0	0
2	2	0	9	1.24345e-15	1.24345e-15
2	2	0	10	-6.03961e-15	-6.03961e-15
3	2	0	1	2.30926e-14	2.30926e-14
3	2	0	2	1.81188e-14	1.81188e-14
3	2	0	3	1.24345e-14	1.24345e-14
3	2	0	4	2.30926e-14	2.30926e-14
3	2	0	5	-3.73035e-15	-3.73035e-15
3	2	0	6	-1.53377e-14	-1.53377e-14
3	2	0	7	1.23679e-14	1.23679e-14
3	2	0	8	-8.17124e-15	-8.17124e-15
3	2	0	9	-7.10543e-15	-7.10543e-15
3	2	0	10	-8.01581e-15	-8.01581e-15
4	2	0	1	9.23706e-15	9.23706e-15
4	2	0	2	1.35447e-14	1.35447e-14
4	2	0	3	-1.35003e-14	-1.35003e-14
4	2	0	4	-1.49214e-14	-1.49214e-14
4	2	0	5	4.4853e-15	4.4853e-15
4	2	0	6	-1.90847e-14	-1.90847e-14
4	2	0	7	-1.97176e-14	-1.97176e-14
4	2	0	8	2.0961e-14	2.0961e-14
4	2	0	9	7.65807e-15	7.65807e-15
4	2	0	10	0	0
5	2	0	1	2.20268e-14	2.20268e-14
5	2	0	2	-1.84741e-14	-1.84741e-14
5	2	0	3	-1.81188e-14	-1.81188e-14
5	2	0	4	2.47802e-14	2.47802e-14
5	2	0	5	-5.21805e-15	-5.21805e-15
5	2	0	6	2.22045e-15	2.22045e-15
5	2	0	7	0	0
5	2	0	8	-1.42109e-14	-1.42109e-14
5	2	0	9	9.23706e-15	9.23706e-15
5	2	0	10	0	0
6	2	0	1	2.84217e-15	2.84217e-15
6	2	0	2	5.31797e-15	5.31797e-15
6	2	0	3	1.08358e-14	1.08358e-14
6	2	0	4	1.93179e-14	1.93179e-14
6	2	0	5	-2.93099e-15	-2.93099e-15
6	2	0	6	-2.76446e-15	-2.76446e-15
6	2	0	7	-5.07372e-15	-5.07372e-15
6	2	0	8	-8.03801e-15	-8.03801e-15
6	2	0	9	-1.40332e-14	-1.40332e-14
6	2	0	10	-1.01252e-14	-1.01252e-14
7	2	0	1	1.19016e-14	1.19016e-14
7	2	0	2	0	0
7	2	0	3	0	0
7	2	0	4	-9.23706e-15	-9.23706e-15
7	2	0	5	4.61853e-15	4.61853e-15
7	2	0	6	4.53526e-15	4.53526e-15
7	2	0	7	7.63833e-15	7.63833e-15
7	2	0	8	-7.4496e-15	-7.4496e-15
7	2	0	9	0	0
7	2	0	10	0	0
8	2	0	1	-1.15463e-14	-1.15463e-14
8	2	0	2	2.39808e-15	2.39808e-15
8	2	0	3	2.36478e-15	2.36478e-15
8	2	0	4	5.05151e-15	5.05151e-15
8	2	0	5	4.79616e-15	4.79616e-15
8	2	0	6	-7.10543e-15	-7.10543e-15
8	2	0	7	7.59393e-15	7.59393e-15
8	2	0	8	5.50671e-15	5.50671e-15
8	2	0	9	-1.39444e-14	-1.39444e-14
8	2	0	10	-2.35367e-15	-2.35367e-15
9	2	0	1	-2.53131e-15	-2.53131e-15
9	2	0	2	-4.72955e-15	-4.72955e-15
9	2	0	3	1.01308e-14	1.01308e-14
9	2	0	4	-1.26121e-14	-1.26121e-14
9	2	0	5	5.32907e-15	5.32907e-15
9	2	0	6	7.54952e-15	7.54952e-15
9	2	0	7	0	0
9	2	0	8	7.44405e-15	7.44405e-15
9	2	0	9	-7.81597e-15	-7.81597e-15
9	2	0	10	-7.54952e-15	-7.54952e-15
10	2	0	1	2.53131e-15	2.53131e-15
10	2	0	2	2.4869e-15	2.4869e-15
10	2	0	3	8.03801e-15	8.03801e-15
10	2	0	4	-2.4869e-15	-2.4869e-15
10	2	0	5	-1.06581e-14	-1.06581e-14
10	2	0	6	-7.93809e-15	-7.93809e-15
10	2	0	7	-7.59393e-15	-7.59393e-15
10	2	0	8	1.29674e-14	1.29674e-14
10	2	0	9	7.63833e-15	7.63833e-15
10	2	0	10	-2.93099e-15	-2.93099e-15
11	2	0	1	-1.35003e-14	-1.35003e-14
11	2	0	2	0	0
11	2	0	3	0	0
11	2	0	4	1.24345e-14	1.24345e-14
11	2	0	5	1.24678e-14	1.24678e-14
11	2	0	6	2.39808e-15	2.39808e-15
11	2	0	7	-1.33227e-14	-1.33227e-14
11	2	0	8	7.81597e-15	7.81597e-15
11	2	0	9	-1.22347e-14	-1.22347e-14
11	2	0	10	7.68274e-15	7.68274e-15
12	2	0	1	-9.01501e-15	-9.01501e-15
12	2	0	2	9.23706e-15	9.23706e-15
12	2	0	3	-2.4869e-15	-2.4869e-15
12	2	0	4	5.32907e-15	5.32907e-15
12	2	0	5	0	0
12	2	0	6	7.14984e-15	7.14984e-15
12	2	0	7	0	0
12	2	0	8	4.61853e-15	4.61853e-15
12	2	0	9	2.59237e-15	2.59237e-15
12	2	0	10	-1.06581e-14	-1.06581e-14
13	2	0	1	1.10134e-14	1.10134e-14
13	2	0	2	-4.26326e-15	-4.26326e-15
13	2	0	3	2.08722e-14	2.08722e-14
13	2	0	4	-4.61853e-15	-4.61853e-15
13	2	0	5	1.18128e-14	1.18128e-14
13	2	0	6	0	0
13	2	0	7	0	0
13	2	0	8	7.92699e-15	7.92699e-15
13	2	0	9	0	0
13	2	0	10	-7.91589e-15	-7.91589e-15
14	2	0	1	0	0
14	2	0	2	-1.35891e-14	-1.35891e-14
14	2	0	3	0	0
14	2	0	4	-4.61853e-15	-4.61853e-15
14	2	0	5	1.16573e-16	1.16573e-16
14	2	0	6	2.4869e-15	2.4869e-15
14	2	0	7	1.19016e-14	1.19016e-14
14	2	0	8	-4.79616e-15	-4.79616e-15
14	2	0	9	7.28306e-15	7.28306e-15
14	2	0	10	6.5945e-15	6.5945e-15
15	2	0	1	6.75016e-15	6.75016e-15
15	2	0	2	-1.53533e-14	-1.53533e-14
15	2	0	3	-1.53655e-14	-1.53655e-14
15	2	0	4	4.26326e-15	4.26326e-15
15	2	0	5	1.06137e-14	1.06137e-14
15	2	0	6	-2.10054e-14	-2.10054e-14
15	2	0	7	1.08358e-14	1.08358e-14
15	2	0	8	-1.08802e-14	-1.08802e-14
15	2	0	9	-4.08562e-15	-4.08562e-15
15	2	0	10	0	0
16	2	0	1	-2.42029e-15	-2.42029e-15
16	2	0	2	-2.57572e-15	-2.57572e-15
16	2	0	3	-1.03029e-14	-1.03029e-14
16	2	0	4	-1.19016e-14	-1.19016e-14
16	2	0	5	5.32907e-15	5.32907e-15
16	2	0	6	0	0
16	2	0	7	6.83897e-15	6.83897e-15
16	2	0	8	-1.00025e-14	-1.00025e-14
16	2	0	9	-1.1835e-14	-1.1835e-14
16	2	0	10	2.498e-15	2.498e-15
17	2	0	1	2.30926e-15	2.30926e-15
17	2	0	2	0	0
17	2	0	3	0	0
17	2	0	4	-1.1724e-14	-1.1724e-14
17	2	0	5	-4.08562e-15	-4.08562e-15
17	2	0	6	1.35003e-14	1.35003e-14
17	2	0	7	-8.88178e-15	-8.88178e-15
17	2	0	8	-6.57252e-15	-6.57252e-15
17	2	0	9	0	0
17	2	0	10	0	0
18	2	0	1	4.9738e-15	4.9738e-15
18	2	0	2	-2.70894e-15	-2.70894e-15
18	2	0	3	-5.24025e-15	-5.24025e-15
18	2	0	4	-1.88738e-14	-1.88738e-14
18	2	0	5	-5.32907e-15	-5.32907e-15
18	2	0	6	1.5099e-14	1.5099e-14
18	2	0	7	1.35614e-14	1.35614e-14
18	2	0	8	1.20792e-14	1.20792e-14
18	2	0	9	-5.06262e-15	-5.06262e-15
18	2	0	10	5.41789e-15	5.41789e-15
19	2	0	1	-6.39488e-15	-6.39488e-15
19	2	0	2	9.76996e-15	9.76996e-15
19	2	0	3	-3.19744e-15	-3.19744e-15
19	2	0	4	1.54043e-14	1.54043e-14
19	2	0	5	9.68114e-15	9.68114e-15
19	2	0	6	-6.57252e-15	-6.57252e-15
19	2	0	7	0	0
19	2	0	8	-3.19744e-15	-3.19744e-15
19	2	0	9	0	0
19	2	0	10	-6.57252e-15	-6.57252e-15
20	2	0	1	0	0
20	2	0	2	-4.9738e-15	-4.9738e-15
20	2	0	3	-1.38556e-14	-1.38556e-14
20	2	0	4	-5.15143e-15	-5.15143e-15
20	2	0	5	-4.9738e-15	-4.9738e-15
20	2	0	6	4.85404e-15	4.85404e-15
20	2	0	7	7.4607e-15	7.4607e-15
20	2	0	8	-9.76996e-15	-9.76996e-15
20	2	0	9	-7.10543e-15	-7.10543e-15
20	2	0	10	3.19744e-15	3.19744e-15
21	2	0	1	-2.4869e-15	-2.4869e-15
21	2	0	2	-8.88178e-15	-8.88178e-15
21	2	0	3	1.85629e-14	1.85629e-14
21	2	0	4	-1.35003e-14	-1.35003e-14
21	2	0	5	-1.22569e-14	-1.22569e-14
21	2	0	6	0	0
21	2	0	7	1.22569e-14	1.22569e-14
21	2	0	8	7.81597e-15	7.81597e-15
21	2	0	9	1.43885e-14	1.43885e-14
21	2	0	10	1.26121e-14	1.26121e-14
22	2	0	1	1.03029e-14	1.03029e-14
22	2	0	2	4.88498e-15	4.88498e-15
22	2	0	3	8.61533e-15	8.61533e-15
22	2	0	4	0	0
22	2	0	5	-3.01981e-15	-3.01981e-15
22	2	0	6	-5.68434e-15	-5.68434e-15
22	2	0	7	-7.10543e-15	-7.10543e-15
22	2	0	8	1.71307e-14	1.71307e-14
22	2	0	9	-1.3145e-14	-1.3145e-14
22	2	0	10	0	0
23	2	0	1	9.23706e-15	9.23706e-15
23	2	0	2	-1.45661e-14	-1.45661e-14
23	2	0	3	1.3145e-14	1.3145e-14
23	2	0	4	-1.39444e-14	-1.39444e-14
23	2	0	5	5.77316e-15	5.77316e-15
23	2	0	6	-2.84217e-15	-2.84217e-15
23	2	0	7	-5.55112e-15	-5.55112e-15
23	2	0	8	-5.9508e-15	-5.9508e-15
23	2	0	9	1.35003e-14	1.35003e-14
23	2	0	10	0	0
24	2	0	1	-1.66533e-14	-1.66533e-14
24	2	0	2	-2.66454e-15	-2.66454e-15
24	2	0	3	-1.38556e-14	-1.38556e-14
24	2	0	4	-8.30447e-15	-8.30447e-15
24	2	0	5	-2.66454e-15	-2.66454e-15
24	2	0	6	2.88658e-15	2.88658e-15
24	2	0	7	-8.34888e-15	-8.34888e-15
24	2	0	8	-8.70415e-15	-8.70415e-15
24	2	0	9	1.88294e-14	1.88294e-14
24	2	0	10	-1.45661e-14	-1.45661e-14
25	2	0	1	1.01419e-14	1.01419e-14
25	2	0	2	-8.34888e-15	-8.34888e-15
25	2	0	3	0	0
25	2	0	4	-5.68434e-15	-5.68434e-15
25	2	0	5	-4.08562e-15	-4.08562e-15
25	2	0	6	-4.44089e-15	-4.44089e-15
25	2	0	7	-1.19238e-14	-1.19238e-14
25	2	0	8	1.12799e-14	1.12799e-14
25	2	0	9	4.26326e-15	4.26326e-15
25	2	0	10	-1.18794e-14	-1.18794e-14
26	2	0	1	7.82707e-15	7.82707e-15
26	2	0	2	-5.24025e-15	-5.24025e-15
26	2	0	3	5.68434e-15	5.68434e-15
26	2	0	4	-7.99361e-15	-7.99361e-15
26	2	0	5	-2.57572e-15	-2.57572e-15
26	2	0	6	-5.50671e-15	-5.50671e-15
26	2	0	7	-1.29674e-14	-1.29674e-14
26	2	0	8	2.75335e-15	2.75335e-15
26	2	0	9	1.06581e-14	1.06581e-14
26	2	0	10	-2.66454e-15	-2.66454e-15
27	2	0	1	-6.83897e-15	-6.83897e-15
27	2	0	2	7.28306e-15	7.28306e-15
27	2	0	3	-1.01918e-14	-1.01918e-14
27	2	0	4	0	0
27	2	0	5	-1.42386e-14	-1.42386e-14
27	2	0	6	-1.82965e-14	-1.82965e-14
27	2	0	7	0	0
27	2	0	8	-2.66454e-15	-2.66454e-15
27	2	0	9	-8.19345e-15	-8.19345e-15
27	2	0	10	-2.4869e-15	-2.4869e-15
1	2	1	1	0.969305	-4.41572
1	2	1	2	3.01109	0.633914
1	2	1	3	-4.44618	-3.01612
1	2	1	4	-2.84006	-2.59093
1	2	1	5	0.7109	2.94892
1	2	1	6	-4.29043	-4.0154
1	2	1	7	2.11268	-1.9301
1	2	1	8	-4.02477	-5.31476
1	2	1	9	-0.390625	-1.04167
1	2	1	10	15.2246	13.1448
2	2	1	1	10.9496	2.06718
2	2	1	2	4.35169	-10.894
2	2	1	3	7.20803	4.31873
2	2	1	4	-1.88834	5.36398
2	2	1	5	-9.24956	3.54857
2	2	1	6	-1.83246	2.96684
2	2	1	7	-2.35081	10.9102
2	2	1	8	-4.8913	-4.24431
2	2	1	9	5	-3.05556
2	2	1	10	32.969	-10.1396
3	2	1	1	2.27273	5.76923
3	2	1	2	-6.71031	-0.163666
3	2	1	3	6.87023	6.55216
3	2	1	4	13.7201	-2.39411
3	2	1	5	4.24354	-1.59902
3	2	1	6	-0.690846	-5.00864
3	2	1	7	13.6865	11.479
3	2	1	8	8.16876	2.33393
3	2	1	9	4.92505	-7.56602
3	2	1	10	-2.8777	-5.57554
4	2	1	1	1.91083	-4.4586
4	2	1	2	6.99797	-2.97498
4	2	1	3	-0.705645	3.83065
4	2	1	4	5.89942	2.51451
4	2	1	5	-2.69461	-6.52029
4	2	1	6	-4.92278	-0.900901
4	2	1	7	2.45098	-5.22876
4	2	1	8	1.79924	-10.3535
4	2	1	9	3.88889	-2.59259
4	2	1	10	9.43983	5.46335
5	2	1	1	-5.63725	3.75817
5	2	1	2	33.2418	17.674
5	2	1	3	10.5477	-6.35565
5	2	1	4	4.26009	0.523169
5	2	1	5	12.529	-1.77881
5	2	1	6	-12.069	-0.766284
5	2	1	7	-2.51196	9.64912
5	2	1	8	-6.31808	-4.13943
5	2	1	9	7.6087	-16.6667
5	2	1	10	-18.4783	-3.26087
6	2	1	1	1.07656	3.26954
6	2	1	2	-4.07674	-0.0799361
6	2	1	3	-4.12621	5.58252
6	2	1	4	-0.124069	5.87262
6	2	1	5	0.719424	2.31815
6	2	1	6	-1.10565	-1.7199
6	2	1	7	-6.75057	2.21205
6	2	1	8	-4.30622	3.26954
6	2	1	9	6.95876	4.38144
6	2	1	10	-8.10502	-10.1979
7	2	1	1	9.51327	-1.17994
7	2	1	2	8.0786	0.0727802
7	2	1	3	5.64854	0.069735
7	2	1	4	-6.62651	-6.62651
7	2	1	5	-1.71371	-2.55376
7	2	1	6	9.60334	0.904662
7	2	1	7	-0.561798	2.62172
7	2	1	8	3.23661	3.0506
7	2	1	9	2.72537	-1.81691
7	2	1	10	-1.60183	12.8909
8	2	1	1	0.831601	-4.0194
8	2	1	2	-3.19149	0.70922
8	2	1	3	-7.11253	-0.566171
8	2	1	4	-1.766	-1.03017
8	2	1	5	4.43723	2.81385
8	2	1	6	36.1032	35.6256
8	2	1	7	7.77778	4.07407
8	2	1	8	17.8304	4.32253
8	2	1	9	3.19149	8.51064
8	2	1	10	-3.80435	2.53623
9	2	1	1	3.69955	0.523169
9	2	1	2	-0.974026	0.649351
9	2	1	3	5.35308	-0.531511
9	2	1	4	-3.31808	-5.41571
9	2	1	5	-1.86916	0.0778816
9	2	1	6	2.60771	-2.49433
9	2	1	7	-6.38767	-3.45081
9	2	1	8	3.68664	-1.68971
9	2	1	9	5.90278	3.39506
9	2	1	10	0.111857	-1.566
10	2	1	1	-3.53881	-1.06545
10	2	1	2	0.845411	5.07246
10	2	1	3	2.30024	-3.1477
10	2	1	4	-0.700935	-8.09969
10	2	1	5	6.52709	4.6798
10	2	1	6	0.950119	-4.98812
10	2	1	7	2.84091	-5.68182
10	2	1	8	11.5654	3.19315
10	2	1	9	-4.46224	-6.17849
10	2	1	10	7.22611	-7.14841
11	2	1	1	2.98507	3.9801
11	2	1	2	0.7109	2.29068
11	2	1	3	-2.35294	-1.17647
11	2	1	4	-0.224215	-4.33483
11	2	1	5	-5.48098	-7.53169
11	2	1	6	6.19469	-6.71091
11	2	1	7	6.97115	1.76282
11	2	1	8	-0.119617	2.87081
11	2	1	9	-1.98238	-8.59031
11	2	1	10	-4.54545	-3.78788
12	2	1	1	-4.35223	-10.9312
12	2	1	2	-5.47521	-3.92562
12	2	1	3	7.46102	-0.890869
12	2	1	4	6.72854	6.72854
12	2	1	5	8.62069	1.14943
12	2	1	6	-9.91471	-8.67093
12	2	1	7	0.896861	-2.84006
12	2	1	8	-2.42616	-9.2827
12	2	1	9	2.57848	6.12855
12	2	1	10	17.5418	7.39857
13	2	1	1	9.62302	9.78836
13	2	1	2	-7.84672	3.71046
13	2	1	3	0.852273	-5.61869
13	2	1	4	-0.10352	6.62526
13	2	1	5	1.33929	0.892857
13	2	1	6	0.765306	-5.04535
13	2	1	7	5.66038	3.77358
13	2	1	8	-3.64121	-2.90112
13	2	1	9	4.13081	0.688468
13	2	1	10	-0.0896057	-6.21266
14	2	1	1	7.34733	4.64377
14	2	1	2	7.87321	-2.52215
14	2	1	3	7.21248	2.66407
14	2	1	4	18.0233	21.3178
14	2	1	5	0.680934	-2.39948
14	2	1	6	-8.43621	-15.2949
14	2	1	7	-4.91453	1.85185
14	2	1	8	-4.33404	1.83228
14	2	1	9	-0.107991	3.67171
14	2	1	10	0.990099	7.58504e-13
15	2	1	1	5.26316	0.539811
15	2	1	2	-2.45098	-0.980392
15	2	1	3	4.29142	-2.86094
15	2	1	4	0.687623	-8.97184
15	2	1	5	0.767754	4.60653
15	2	1	6	-2.17391	-3.90674
15	2	1	7	2.9703	1.9802
15	2	1	8	-2.08748	1.723
15	2	1	9	-2.88104	-0.86741
15	2	1	10	-2.83019	-2.83019
16	2	1	1	5.92255	4.0243
16	2	1	2	1.87225	2.42291
16	2	1	3	7.14286	4.68632
16	2	1	4	-1.72786	-1.72786
16	2	1	5	1.08959	-0.726392
16	2	1	6	-6.4588	-0.148478
16	2	1	7	-0.423729	-2.89548
16	2	1	8	-0.561798	4.11985
16	2	1	9	2.75424	-7.83898
16	2	1	10	-7.57238	4.67706
17	2	1	1	8.12236	9.00141
17	2	1	2	-1.96078	-0.326797
17	2	1	3	-1.53061	4.42177
17	2	1	4	-2.74841	0.775194
17	2	1	5	2.52809	-8.2397
17	2	1	6	4.08367	-1.06242
17	2	1	7	13.6831	5.28121
17	2	1	8	3.74494	4.92578
17	2	1	9	2.77247	-5.03505
17	2	1	10	-0.845865	-4.7619
18	2	1	1	-0.452489	1.43288
18	2	1	2	1.14943	0.766284
18	2	1	3	-3.97727	3.0303
18	2	1	4	-2.06813	1.78427
18	2	1	5	8.46868	-2.9389
18	2	1	6	0.686499	-0.457666
18	2	1	7	-2.17391	2.657
18	2	1	8	0.770925	-4.18502
18	2	1	9	-7.75109	-5.74964
18	2	1	10	3.01205	7.22892
19	2	1	1	1.92024	5.36681
19	2	1	2	-0.146843	-3.57318
19	2	1	3	-4.16048	-7.37989
19	2	1	4	0.140056	-4.29505
19	2	1	5	2.68505	-2.27383
19	2	1	6	-3.61891	-0.0492368
19	2	1	7	2.35921	-19.3303
19	2	1	8	-2.28614	-6.588
19	2	1	9	-18.7898	-4.98938
19	2	1	10	8.71157	-1.1713
20	2	1	1	-15.3005	-20.765
20	2	1	2	-1.90583	4.63378
20	2	1	3	-4.48852	3.68824
20	2	1	4	3.3105	8.82801
20	2	1	5	10.984	8.31426
20	2	1	6	1.68539	-7.86517
20	2	1	7	0.971922	-0.287977
20	2	1	8	7.06522	-6.15942
20	2	1	9	-9.04366	-8.17741
20	2	1	10	13.6364	-0.717703
21	2	1	1	1.25	-0.416667
21	2	1	2	7.30416e-13	0.438596
21	2	1	3	2.38095	-2.38095
21	2	1	4	4.06699	2.87081
21	2	1	5	2.07424	-4.65793
21	2	1	6	-3.33333	-5.18519
21	2	1	7	-4.60526	3.43567
21	2	1	8	0.46729	7.47664
21	2	1	9	4.21166	-5.68754
21	2	1	10	5.83524	1.83066
22	2	1	1	-2.97619	6.87277e-13
22	2	1	2	-4.3956	-4.7619
22	2	1	3	-0.127226	0.0848176
22	2	1	4	10.0478	0.877193
22	2	1	5	3.01508	1.75879
22	2	1	6	-0.503778	0.335852
22	2	1	7	-2.07715	9.79228
22	2	1	8	-3.125	3.125
22	2	1	9	-8.08824	-5.39216
22	2	1	10	17.7885	24.4658
23	2	1	1	7.62943	4.4505
23	2	1	2	-1.94805	3.8961
23	2	1	3	-3.98126	-1.24902
23	2	1	4	-0.990099	0.660066
23	2	1	5	-1.01523	4.06091
23	2	1	6	4.11311	2.39931
23	2	1	7	-2.5	-0.833333
23	2	1	8	-0.262467	4.54943
23	2	1	9	-3.04878	-1.62602
23	2	1	10	-4.7619	-1.19048
24	2	1	1	1.99005	1.16086
24	2	1	2	1.89873	1.26582
24	2	1	3	8.10811	2.7846
24	2	1	4	2.10396	2.31023
24	2	1	5	5.38642	-2.02966
24	2	1	6	9.09091	2.1645
24	2	1	7	-2.91262	0.728155
24	2	1	8	1.94175	0.728155
24	2	1	9	2.21675	1.80624
24	2	1	10	5.94315	-2.23945
25	2	1	1	-5.21978	-1.0989
25	2	1	2	4.6729	4.6729
25	2	1	3	1.59176	0.811486
25	2	1	4	0.361664	0.964436
25	2	1	5	11.8952	9.87903
25	2	1	6	4.86891	3.62047
25	2	1	7	-3.29768	-4.0404
25	2	1	8	-2.07972	-7.56788
25	2	1	9	0.438596	-2.63158
25	2	1	10	2.21239	3.83481
26	2	1	1	6.11511	1.1191
26	2	1	2	-1.42518	-3.00871
26	2	1	3	1.78117	7.29432
26	2	1	4	2.43902	3.25203
26	2	1	5	1.0514	2.41433
26	2	1	6	2.59434	0.628931
26	2	1	7	-4.4289	-0.1554
26	2	1	8	4.83871	-1.98511
26	2	1	9	4.91607	5.51559
26	2	1	10	-3.46945e-13	-1.66667
27	2	1	1	-6.58174	-13.6589
27	2	1	2	-0.843882	-2.60197
27	2	1	3	-1.94954	-0.229358
27	2	1	4	7.71277	16.1348
27	2	1	5	-5.04292	-8.08298
27	2	1	6	1.87354	3.0445
27	2	1	7	-6.72573e-13	0.392157
27	2	1	8	-5.25114	-2.96804
27	2	1	9	13.0221	-0.900901
27	2	1	10	9.79217e-13	-0.392157
1	3	0	1	-3.37508e-15	-3.37508e-15
1	3	0	2	-6.83897e-15	-6.83897e-15
1	3	0	3	1.79412e-14	1.79412e-14
1	3	0	4	1.30562e-14	1.30562e-14
1	3	0	5	-3.37508e-15	-3.37508e-15
1	3	0	6	0	0
1	3	0	7	-3.4639e-15	-3.4639e-15
1	3	0	8	-1.49214e-14	-1.49214e-14
1	3	0	9	1.82965e-14	1.82965e-14
1	3	0	10	0	0
2	3	0	1	4.10783e-15	4.10783e-15
2	3	0	2	-2.77112e-14	-2.77112e-14
2	3	0	3	1.10134e-14	1.10134e-14
2	3	0	4	1.1724e-14	1.1724e-14
2	3	0	5	0	0
2	3	0	6	0	0
2	3	0	7	0	0
2	3	0	8	0	0
2	3	0	9	-1.1724e-14	-1.1724e-14
2	3	0	10	1.95399e-15	1.95399e-15
3	3	0	1	0	0
3	3	0	2	-1.43885e-14	-1.43885e-14
3	3	0	3	-7.81597e-15	-7.81597e-15
3	3	0	4	-1.46105e-14	-1.46105e-14
3	3	0	5	-1.27898e-14	-1.27898e-14
3	3	0	6	0	0
3	3	0	7	-1.13687e-14	-1.13687e-14
3	3	0	8	3.95239e-15	3.95239e-15
3	3	0	9	3.73035e-15	3.73035e-15
3	3	0	10	-2.4869e-15	-2.4869e-15
4	3	0	1	6.75016e-15	6.75016e-15
4	3	0	2	0	0
4	3	0	3	-2.10498e-14	-2.10498e-14
4	3	0	4	0	0
4	3	0	5	1.61315e-14	1.61315e-14
4	3	0	6	6.30607e-15	6.30607e-15
4	3	0	7	2.13163e-15	2.13163e-15
4	3	0	8	2.22045e-15	2.22045e-15
4	3	0	9	4.26326e-15	4.26326e-15
4	3	0	10	-1.20792e-14	-1.20792e-14
5	3	0	1	-7.10543e-15	-7.10543e-15
5	3	0	2	-2.13163e-15	-2.13163e-15
5	3	0	3	9.76996e-15	9.76996e-15
5	3	0	4	4.9738e-15	4.9738e-15
5	3	0	5	-2.30926e-14	-2.30926e-14
5	3	0	6	1.86517e-14	1.86517e-14
5	3	0	7	0	0
5	3	0	8	4.79616e-15	4.79616e-15
5	3	0	9	-5.24025e-15	-5.24025e-15
5	3	0	10	0	0
6	3	0	1	5.68434e-15	5.68434e-15
6	3	0	2	5.83422e-15	5.83422e-15
6	3	0	3	-5.24025e-15	-5.24025e-15
6	3	0	4	1.95399e-14	1.95399e-14
6	3	0	5	0	0
6	3	0	6	-1.87628e-14	-1.87628e-14
6	3	0	7	-2.66454e-15	-2.66454e-15
6	3	0	8	7.99361e-15	7.99361e-15
6	3	0	9	-1.36779e-14	-1.36779e-14
6	3	0	10	-3.19744e-15	-3.19744e-15
7	3	0	1	2.13163e-15	2.13163e-15
7	3	0	2	-2.35367e-15	-2.35367e-15
7	3	0	3	-1.72307e-14	-1.72307e-14
7	3	0	4	4.9738e-15	4.9738e-15
7	3	0	5	0	0
7	3	0	6	0	0
7	3	0	7	4.61853e-15	4.61853e-15
7	3	0	8	-4.9738e-15	-4.9738e-15
7	3	0	9	-7.81597e-15	-7.81597e-15
7	3	0	10	2.30926e-15	2.30926e-15
8	3	0	1	-2.22045e-15	-2.22045e-15
8	3	0	2	-7.63833e-15	-7.63833e-15
8	3	0	3	-5.15143e-15	-5.15143e-15
8	3	0	4	-4.79616e-15	-4.79616e-15
8	3	0	5	7.81597e-15	7.81597e-15
8	3	0	6	0	0
8	3	0	7	1.19016e-14	1.19016e-14
8	3	0	8	-2.84217e-15	-2.84217e-15
8	3	0	9	-4.9738e-15	-4.9738e-15
8	3	0	10	-4.84057e-15	-4.84057e-15
9	3	0	1	-2.57572e-15	-2.57572e-15
9	3	0	2	-1.24345e-14	-1.24345e-14
9	3	0	3	-4.9738e-15	-4.9738e-15
9	3	0	4	-4.9738e-15	-4.9738e-15
9	3	0	5	7.63833e-15	7.63833e-15
9	3	0	6	-1.47882e-14	-1.47882e-14
9	3	0	7	4.88498e-15	4.88498e-15
9	3	0	8	5.32907e-15	5.32907e-15
9	3	0	9	1.22569e-14	1.22569e-14
9	3	0	10	5.15143e-15	5.15143e-15
10	3	0	1	-1.04805e-14	-1.04805e-14
10	3	0	2	-8.57092e-15	-8.57092e-15
10	3	0	3	-8.34888e-15	-8.34888e-15
10	3	0	4	-2.66454e-15	-2.66454e-15
10	3	0	5	1.01474e-14	1.01474e-14
10	3	0	6	7.59393e-15	7.59393e-15
10	3	0	7	-1.08358e-14	-1.08358e-14
10	3	0	8	7.4607e-15	7.4607e-15
10	3	0	9	-2.66454e-15	-2.66454e-15
10	3	0	10	-5.01821e-15	-5.01821e-15
11	3	0	1	0	0
11	3	0	2	-2.84217e-15	-2.84217e-15
11	3	0	3	-5.15143e-15	-5.15143e-15
11	3	0	4	-1.24345e-14	-1.24345e-14
11	3	0	5	2.07834e-14	2.07834e-14
11	3	0	6	-2.67009e-15	-2.67009e-15
11	3	0	7	-2.53131e-15	-2.53131e-15
11	3	0	8	0	0
11	3	0	9	2.4869e-15	2.4869e-15
11	3	0	10	-1.00142e-14	-1.00142e-14
12	3	0	1	1.22125e-16	1.22125e-16
12	3	0	2	9.34808e-15	9.34808e-15
12	3	0	3	-7.39409e-15	-7.39409e-15
12	3	0	4	-4.9738e-15	-4.9738e-15
12	3	0	5	4.88498e-15	4.88498e-15
12	3	0	6	-7.17108e-15	-7.17108e-15
12	3	0	7	4.9738e-15	4.9738e-15
12	3	0	8	-4.89608e-15	-4.89608e-15
12	3	0	9	-7.10543e-15	-7.10543e-15
12	3	0	10	5.21805e-15	5.21805e-15
13	3	0	1	-1.14131e-14	-1.14131e-14
13	3	0	2	-8.88178e-17	-8.88178e-17
13	3	0	3	-2.27596e-15	-2.27596e-15
13	3	0	4	0	0
13	3	0	5	3.55271e-15	3.55271e-15
13	3	0	6	-1.17018e-14	-1.17018e-14
13	3	0	7	0	0
13	3	0	8	-7.99361e-15	-7.99361e-15
13	3	0	9	7.7105e-15	7.7105e-15
13	3	0	10	-4.08562e-15	-4.08562e-15
14	3	0	1	2.14717e-14	2.14717e-14
14	3	0	2	-2.30926e-15	-2.30926e-15
14	3	0	3	1.55209e-14	1.55209e-14
14	3	0	4	4.44089e-15	4.44089e-15
14	3	0	5	2.30926e-15	2.30926e-15
14	3	0	6	0	0
14	3	0	7	2.16716e-14	2.16716e-14
14	3	0	8	-1.7053e-14	-1.7053e-14
14	3	0	9	-2.09666e-14	-2.09666e-14
14	3	0	10	8.89289e-15	8.89289e-15
15	3	0	1	-2.22045e-15	-2.22045e-15
15	3	0	2	1.08358e-14	1.08358e-14
15	3	0	3	0	0
15	3	0	4	0	0
15	3	0	5	1.77636e-15	1.77636e-15
15	3	0	6	2.13163e-15	2.13163e-15
15	3	0	7	0	0
15	3	0	8	2.12275e-14	2.12275e-14
15	3	0	9	0	0
15	3	0	10	-3.90799e-15	-3.90799e-15
16	3	0	1	7.34968e-15	7.34968e-15
16	3	0	2	-7.17204e-15	-7.17204e-15
16	3	0	3	7.4607e-15	7.4607e-15
16	3	0	4	-5.15143e-15	-5.15143e-15
16	3	0	5	0	0
16	3	0	6	2.66454e-15	2.66454e-15
16	3	0	7	-1.49658e-14	-1.49658e-14
16	3	0	8	-4.9738e-15	-4.9738e-15
16	3	0	9	1.95399e-14	1.95399e-14
16	3	0	10	4.9738e-15	4.9738e-15
17	3	0	1	7.10543e-15	7.10543e-15
17	3	0	2	-1.96732e-14	-1.96732e-14
17	3	0	3	1.39444e-14	1.39444e-14
17	3	0	4	1.2168e-14	1.2168e-14
17	3	0	5	2.0961e-14	2.0961e-14
17	3	0	6	1.63425e-14	1.63425e-14
17	3	0	7	0	0
17	3	0	8	0	0
17	3	0	9	-3.95239e-15	-3.95239e-15
17	3	0	10	6.66134e-15	6.66134e-15
18	3	0	1	-1.5099e-14	-1.5099e-14
18	3	0	2	7.63833e-15	7.63833e-15
18	3	0	3	4.9738e-15	4.9738e-15
18	3	0	4	2.29261e-15	2.29261e-15
18	3	0	5	1.82077e-14	1.82077e-14
18	3	0	6	1.3145e-14	1.3145e-14
18	3	0	7	0	0
18	3	0	8	2.84217e-15	2.84217e-15
18	3	0	9	-2.53131e-15	-2.53131e-15
18	3	0	10	-1.03029e-14	-1.03029e-14
19	3	0	1	-1.25677e-14	-1.25677e-14
19	3	0	2	-1.24345e-14	-1.24345e-14
19	3	0	3	3.01981e-15	3.01981e-15
19	3	0	4	-6.57252e-15	-6.57252e-15
19	3	0	5	9.9476e-15	9.9476e-15
19	3	0	6	9.9476e-15	9.9476e-15
19	3	0	7	-9.59233e-15	-9.59233e-15
19	3	0	8	-6.21725e-15	-6.21725e-15
19	3	0	9	-9.59233e-15	-9.59233e-15
19	3	0	10	-6.75016e-15	-6.75016e-15
20	3	0	1	-1.96287e-14	-1.96287e-14
20	3	0	2	4.9738e-15	4.9738e-15
20	3	0	3	-4.26326e-15	-4.26326e-15
20	3	0	4	2.30926e-15	2.30926e-15
20	3	0	5	5.15143e-15	5.15143e-15
20	3	0	6	-1.13687e-14	-1.13687e-14
20	3	0	7	-5.32907e-15	-5.32907e-15
20	3	0	8	-4.9738e-15	-4.9738e-15
20	3	0	9	7.4607e-15	7.4607e-15
20	3	0	10	1.74083e-14	1.74083e-14
21	3	0	1	-5.68434e-15	-5.68434e-15
21	3	0	2	-5.50671e-15	-5.50671e-15
21	3	0	3	-2.70894e-15	-2.70894e-15
21	3	0	4	-2.4869e-15	-2.4869e-15
21	3	0	5	5.15143e-15	5.15143e-15
21	3	0	6	2.39808e-15	2.39808e-15
21	3	0	7	2.66454e-15	2.66454e-15
21	3	0	8	4.79616e-15	4.79616e-15
21	3	0	9	2.28706e-15	2.28706e-15
21	3	0	10	7.4607e-15	7.4607e-15
22	3	0	1	-1.42109e-14	-1.42109e-14
22	3	0	2	-5.50671e-15	-5.50671e-15
22	3	0	3	-1.05693e-14	-1.05693e-14
22	3	0	4	1.09246e-14	1.09246e-14
22	3	0	5	8.43769e-15	8.43769e-15
22	3	0	6	0	0
22	3	0	7	6.03961e-15	6.03961e-15
22	3	0	8	6.39488e-15	6.39488e-15
22	3	0	9	1.91847e-14	1.91847e-14
22	3	0	10	-2.34479e-14	-2.34479e-14
23	3	0	1	0	0
23	3	0	2	0	0
23	3	0	3	7.81597e-15	7.81597e-15
23	3	0	4	8.61533e-15	8.61533e-15
23	3	0	5	0	0
23	3	0	6	-3.19744e-15	-3.19744e-15
23	3	0	7	-8.17124e-15	-8.17124e-15
23	3	0	8	-8.34888e-15	-8.34888e-15
23	3	0	9	5.22333e-15	5.22333e-15
23	3	0	10	8.70415e-15	8.70415e-15
24	3	0	1	-2.84217e-15	-2.84217e-15
24	3	0	2	-5.15143e-15	-5.15143e-15
24	3	0	3	1.7053e-14	1.7053e-14
24	3	0	4	2.93099e-15	2.93099e-15
24	3	0	5	1.93179e-14	1.93179e-14
24	3	0	6	-1.06137e-14	-1.06137e-14
24	3	0	7	-1.56097e-14	-1.56097e-14
24	3	0	8	-2.59792e-15	-2.59792e-15
24	3	0	9	0	0
24	3	0	10	8.43769e-15	8.43769e-15
25	3	0	1	7.77156e-15	7.77156e-15
25	3	0	2	7.32747e-15	7.32747e-15
25	3	0	3	1.59872e-14	1.59872e-14
25	3	0	4	-1.59872e-15	-1.59872e-15
25	3	0	5	1.19016e-14	1.19016e-14
25	3	0	6	7.99361e-15	7.99361e-15
25	3	0	7	-7.99361e-15	-7.99361e-15
25	3	0	8	-3.90799e-15	-3.90799e-15
25	3	0	9	7.63833e-15	7.63833e-15
25	3	0	10	-1.42109e-14	-1.42109e-14
26	3	0	1	-8.14904e-15	-8.14904e-15
26	3	0	2	0	0
26	3	0	3	-8.17124e-15	-8.17124e-15
26	3	0	4	5.50671e-15	5.50671e-15
26	3	0	5	2.4869e-15	2.4869e-15
26	3	0	6	-2.75335e-15	-2.75335e-15
26	3	0	7	-8.08242e-15	-8.08242e-15
26	3	0	8	5.16254e-15	5.16254e-15
26	3	0	9	0	0
26	3	0	10	1.04361e-14	1.04361e-14
27	3	0	1	-1.06581e-14	-1.06581e-14
27	3	0	2	-2.57572e-15	-2.57572e-15
27	3	0	3	2.57572e-15	2.57572e-15
27	3	0	4	0	0
27	3	0	5	-5.32907e-15	-5.32907e-15
27	3	0	6	-4.61853e-15	-4.61853e-15
27	3	0	7	-2.13163e-15	-2.13163e-15
27	3	0	8	1.9007e-14	1.9007e-14
27	3	0	9	-2.89768e-15	-2.89768e-15
27	3	0	10	0	0
1	3	1	1	-2.82012	-5.74187
1	3	1	2	-4.51128	-7.26817
1	3	1	3	3.61842	-1.86404
1	3	1	4	-2.15774	-6.74603
1	3	1	5	1.59817	-6.64637
1	3	1	6	-2.82132	-0.731452
1	3	1	7	-1.59574	-1.4691
1	3	1	8	7.67327	-6.21562
1	3	1	9	3.20724	-1.86404
1	3	1	10	-5.04808	1.76282
2	3	1	1	2.63158	-4.97076
2	3	1	2	4.43038	-1.74804
2	3	1	3	5.6797	3.35196
2	3	1	4	-4.01786	-15.4762
2	3	1	5	23.5392	8.51419
2	3	1	6	-1.11643	0.478469
2	3	1	7	4.30743	-1.7455
2	3	1	8	-27.168	-30.4426
2	3	1	9	-1.1324	-5.92334
2	3	1	10	22.8324	21.0662
3	3	1	1	-2.73038	-1.59272
3	3	1	2	-5.32787	-3.27869
3	3	1	3	-0.184843	5.05237
3	3	1	4	-2.24626	-8.48586
3	3	1	5	9.64912	-3.14327
3	3	1	6	-19.6035	2.79001
3	3	1	7	-19.3686	-18.942
3	3	1	8	2.23368	-8.64834
3	3	1	9	-3.97924	-3.97924
3	3	1	10	6.49203	3.64465
4	3	1	1	6.5	-8.33333
4	3	1	2	-2.77778	-6.44955
4	3	1	3	-16.8251	-15.0824
4	3	1	4	-7.57856	-9.42699
4	3	1	5	1.01476	-14.8216
4	3	1	6	-0.490196	-14.3791
4	3	1	7	-5.22244	-18.4397
4	3	1	8	-7.36607	-10.7143
4	3	1	9	-2.40385	-7.05128
4	3	1	10	13.2979	-1.77305
5	3	1	1	-4.52539	-14.6431
5	3	1	2	16.7426	-3.56872
5	3	1	3	1.17773	-8.2798
5	3	1	4	-2.84091	-1.13636
5	3	1	5	-6.02837	-1.49724
5	3	1	6	-4.98812	-1.82106
5	3	1	7	4.06404	3.85878
5	3	1	8	13.4146	12.1951
5	3	1	9	-0.831354	-3.40459
5	3	1	10	-1.33172	2.90557
6	3	1	1	3.79747	-2.1097
6	3	1	2	2.24439	3.49127
6	3	1	3	1.54394	0.158353
6	3	1	4	5.79345	-2.18304
6	3	1	5	-3.30189	1.41509
6	3	1	6	-0.485437	-10.1942
6	3	1	7	-3.93795	-1.7502
6	3	1	8	-0.243309	-0.243309
6	3	1	9	4.16667	-5.63725
6	3	1	10	12.7968	7.73967
7	3	1	1	2.15606	-0.410678
7	3	1	2	0.436681	-10.1164
7	3	1	3	-1.96078	-7.18954
7	3	1	4	-0.776053	2.36511
7	3	1	5	-5.7377	-3.00546
7	3	1	6	-0.313152	-5.01044
7	3	1	7	6.07676	-0.142146
7	3	1	8	7.46102	5.41945
7	3	1	9	1.38249	0.230415
7	3	1	10	0.108225	-2.95815
8	3	1	1	2.54854	4.36893
8	3	1	2	5.55556	-1.48148
8	3	1	3	-0.107991	-2.08783
8	3	1	4	-4.83871	-3.94265
8	3	1	5	10.7143	7.93651
8	3	1	6	11.5854	11.7886
8	3	1	7	15.0386	13.1105
8	3	1	8	4.30839	2.04082
8	3	1	9	-6.78879	-4.45402
8	3	1	10	-3.84615	-2.9304
9	3	1	1	-0.776053	-1.69993
9	3	1	2	0.336323	3.8864
9	3	1	3	-2.59009	-0.900901
9	3	1	4	-1.14943	0.766284
9	3	1	5	5.98287e-13	-1.11111
9	3	1	6	0.441501	0.809419
9	3	1	7	2.7088	0.451467
9	3	1	8	6.87228e-13	1.19048
9	3	1	9	2.24719	-3.37079
9	3	1	10	0.555556	4.44444
10	3	1	1	-3.07329	-7.0134
10	3	1	2	8.41837	0.340136
10	3	1	3	1.0101	-4.46128
10	3	1	4	2.73159	-4.98812
10	3	1	5	-1.34529	-2.46637
10	3	1	6	-4.5977	-8.04598
10	3	1	7	1.08959	-24.5359
10	3	1	8	-5.55556	-11.8519
10	3	1	9	-5.72792	-6.92124
10	3	1	10	-1.25571	-7.15373
11	3	1	1	2.44845	10.8247
11	3	1	2	4.77941	7.02614
11	3	1	3	-2.90698	-10.8527
11	3	1	4	-1.68539	-3.74532
11	3	1	5	3.14685	-0.932401
11	3	1	6	1.98135	0.2331
11	3	1	7	1.0274	-4.10959
11	3	1	8	-7.8341	-6.68203
11	3	1	9	5.7243	-4.98442
11	3	1	10	-0.900901	-6.90691
12	3	1	1	1.15304	-5.66038
12	3	1	2	-3.88769	-6.40749
12	3	1	3	0.886918	-2.43902
12	3	1	4	-3.47072	-3.10918
12	3	1	5	6.34744	-2.74684
12	3	1	6	5.97826	1.44928
12	3	1	7	-8.2618	-10.2289
12	3	1	8	-5.09761	-3.83225
12	3	1	9	3.2967	-4.7619
12	3	1	10	11.1779	-0.240385
13	3	1	1	3.39506	-0.548697
13	3	1	2	-4.35606	-5.30303
13	3	1	3	8.63095	-3.10847
13	3	1	4	-5.59772	-8.91841
13	3	1	5	0.694444	-11.169
13	3	1	6	0.615114	-0.410076
13	3	1	7	-2.19156	-7.19697
13	3	1	8	3.29068	1.15783
13	3	1	9	1.49385	-3.04628
13	3	1	10	-1.89873	-3.55636
14	3	1	1	-2.59117	-4.35061
14	3	1	2	1.31048	-2.88978
14	3	1	3	1.19048	3.83598
14	3	1	4	1.23967	1.23967
14	3	1	5	-2.42718	-5.82524
14	3	1	6	0.471698	-4.71698
14	3	1	7	-6.06654	-5.08806
14	3	1	8	-8.18584	2.13864
14	3	1	9	-4.06427	-19.9748
14	3	1	10	-0.199601	-5.52229
15	3	1	1	-0.963597	-3.28337
15	3	1	2	-5.76172	-4.94792
15	3	1	3	-2.43902	-6.81676
15	3	1	4	-5.65134	-7.08812
15	3	1	5	4.2065	-5.03505
15	3	1	6	-0.191939	-7.22969
15	3	1	7	-5.72233	-5.87867
15	3	1	8	3.25048	-5.35373
15	3	1	9	-2.38095	-6.66667
15	3	1	10	2.0794	-4.2218
16	3	1	1	0.215517	-3.73563
16	3	1	2	-2.05628	-2.95815
16	3	1	3	4.12027	1.7075
16	3	1	4	-2.05011	-0.911162
16	3	1	5	-0.10917	-2.11063
16	3	1	6	10.5769	3.76603
16	3	1	7	1.5625	-0.297619
16	3	1	8	-0.224215	-4.33483
16	3	1	9	7.85398	4.71976
16	3	1	10	8.74704	7.95902
17	3	1	1	-3.07203	2.04802
17	3	1	2	-2.15264	-5.74038
17	3	1	3	-2.51572	15.304
17	3	1	4	-1.36364	-3.63636
17	3	1	5	-2.54237	-2.69931
17	3	1	6	-2.31481	-3.7037
17	3	1	7	-5.90406	-6.51907
17	3	1	8	24.0545	-23.8527
17	3	1	9	-9.25926	-13.8889
17	3	1	10	-0.705645	-4.23387
18	3	1	1	4.35268	-2.15774
18	3	1	2	-10.0679	-3.09201
18	3	1	3	-1.74897	-7.75034
18	3	1	4	-4.01302	-8.17064
18	3	1	5	1.50812	-3.3256
18	3	1	6	-0.116822	7.86604
18	3	1	7	-1.16279	-4.65116
18	3	1	8	4.73815	0.581879
18	3	1	9	-2.34375	-2.52976
18	3	1	10	-8.59564	5.32688
19	3	1	1	-3.16901	-2.58216
19	3	1	2	1.19048	1.77404
19	3	1	3	-6.60112	0.421348
19	3	1	4	-3.28467	-3.40633
19	3	1	5	3.11573	-0.098912
19	3	1	6	1.11111	-2.22222
19	3	1	7	-1.64521	-5.5794
19	3	1	8	-3.14327	3.07018
19	3	1	9	2.10756	-3.58527
19	3	1	10	7.19697	-3.53535
20	3	1	1	57.9823	-0.221729
20	3	1	2	-2.10177	-2.28614
20	3	1	3	-1.05263	-1.05263
20	3	1	4	2.97984e-13	-5.61404
20	3	1	5	3.44828	-2.29885
20	3	1	6	-2.37603	-1.8595
20	3	1	7	7.77778	-9.62963
20	3	1	8	6.98198	-1.27628
20	3	1	9	-0.419287	-4.26275
20	3	1	10	3.79464	-9.59821
21	3	1	1	-6.81234	0.685518
21	3	1	2	2.57985	-0.900901
21	3	1	3	1.07656	-9.09091
21	3	1	4	1.98135	-8.31391
21	3	1	5	2.37557	-4.97738
21	3	1	6	-4.91453	-6.69516
21	3	1	7	2.04082	-0.982615
21	3	1	8	2.87611	-0.0737463
21	3	1	9	-2.41228	-3.50877
21	3	1	10	4.7836	2.88535
22	3	1	1	6.32911	2.1097
22	3	1	2	4.375	-0.416667
22	3	1	3	5.55556	-2.05761
22	3	1	4	9.5297	-7.17822
22	3	1	5	5.13447	0.651997
22	3	1	6	0.360577	-2.64423
22	3	1	7	4.72973	-9.90991
22	3	1	8	12.8788	13.6364
22	3	1	9	0.290698	22.5775
22	3	1	10	-0.530504	-10.2564
23	3	1	1	2.86458	4.60069
23	3	1	2	1.64141	0.16835
23	3	1	3	-0.932401	-3.2634
23	3	1	4	-0.895141	-0.255754
23	3	1	5	3.58056	1.87553
23	3	1	6	-0.649351	0.865801
23	3	1	7	-0.726392	-2.3406
23	3	1	8	-1.36476	-3.22581
23	3	1	9	3.57143	-1.98413
23	3	1	10	-0.649351	1.7316
24	3	1	1	3.20513	2.99145
24	3	1	2	-0.595238	-4.58004e-13
24	3	1	3	-5.68475	-3.53144
24	3	1	4	-3.75	-1.66667
24	3	1	5	-1.74129	-7.54561
24	3	1	6	-2.019	-0.23753
24	3	1	7	2.11268	-7.277
24	3	1	8	1.28806	-2.41998
24	3	1	9	0.253807	-5.24535
24	3	1	10	-2.67176	1.78117
25	3	1	1	0.79929	-6.74956
25	3	1	2	-6.51801	-4.23099
25	3	1	3	3.74771	-5.85009
25	3	1	4	8.99814	-0.742115
25	3	1	5	0.446429	-0.892857
25	3	1	6	-1.76991	-4.42478
25	3	1	7	-4.01786	-5.35714
25	3	1	8	10.8059	2.86935
25	3	1	9	-2.00348	-2.72938
25	3	1	10	-7.39203	-3.37763
26	3	1	1	0.737101	-3.3579
26	3	1	2	5.03686	0.3276
26	3	1	3	8.02469	7.40741
26	3	1	4	-10.241	-10.0402
26	3	1	5	-1.566	-5.66741
26	3	1	6	8.24742	10.8247
26	3	1	7	3.15534	-2.10356
26	3	1	8	-3.22581	-5.14593
26	3	1	9	-2.58216	-3.75587
26	3	1	10	1.28806	-0.858704
27	3	1	1	-7.2104	-2.67928
27	3	1	2	3.0445	4.9961
27	3	1	3	-7.46753	-8.00866
27	3	1	4	-3.22581	0.230415
27	3	1	5	19.0758	19.2733
27	3	1	6	3.125	-21.5278
27	3	1	7	-10.101	-10.101
27	3	1	8	11.1111	5.87762
27	3	1	9	1.35135	5.65111
27	3	1	10	1.61663	1.61663
1	4	0	1	0	0
1	4	0	2	-1.74083e-14	-1.74083e-14
1	4	0	3	-2.44249e-16	-2.44249e-16
1	4	0	4	0	0
1	4	0	5	0	0
1	4	0	6	-3.90799e-15	-3.90799e-15
1	4	0	7	3.0983e-18	3.0983e-18
1	4	0	8	-3.37508e-15	-3.37508e-15
1	4	0	9	7.63833e-15	7.63833e-15
1	4	0	10	-1.13687e-14	-1.13687e-14
2	4	0	1	-8.34888e-15	-8.34888e-15
2	4	0	2	1.63425e-14	1.63425e-14
2	4	0	3	-1.18572e-14	-1.18572e-14
2	4	0	4	4.08562e-15	4.08562e-15
2	4	0	5	1.70804e-18	1.70804e-18
2	4	0	6	0	0
2	4	0	7	4.26326e-15	4.26326e-15
2	4	0	8	0	0
2	4	0	9	3.55271e-15	3.55271e-15
2	4	0	10	1.75859e-14	1.75859e-14
3	4	0	1	3.90799e-15	3.90799e-15
3	4	0	2	3.73035e-15	3.73035e-15
3	4	0	3	0	0
3	4	0	4	0	0
3	4	0	5	2.14939e-14	2.14939e-14
3	4	0	6	-1.17906e-14	-1.17906e-14
3	4	0	7	0	0
3	4	0	8	9.41469e-15	9.41469e-15
3	4	0	9	1.62537e-14	1.62537e-14
3	4	0	10	1.19016e-14	1.19016e-14
4	4	0	1	1.06581e-14	1.06581e-14
4	4	0	2	0	0
4	4	0	3	4.996e-17	4.996e-17
4	4	0	4	2.22045e-15	2.22045e-15
4	4	0	5	-9.01501e-15	-9.01501e-15
4	4	0	6	2.08722e-14	2.08722e-14
4	4	0	7	6.39488e-15	6.39488e-15
4	4	0	8	0	0
4	4	0	9	6.75016e-15	6.75016e-15
4	4	0	10	0	0
5	4	0	1	1.803e-14	1.803e-14
5	4	0	2	0	0
5	4	0	3	-2.84217e-15	-2.84217e-15
5	4	0	4	0	0
5	4	0	5	-7.99361e-15	-7.99361e-15
5	4	0	6	0	0
5	4	0	7	-5.32907e-15	-5.32907e-15
5	4	0	8	1.79412e-14	1.79412e-14
5	4	0	9	8.34888e-15	8.34888e-15
5	4	0	10	-2.84217e-15	-2.84217e-15
6	4	0	1	-5.68434e-15	-5.68434e-15
6	4	0	2	-8.52651e-15	-8.52651e-15
6	4	0	3	-2.93099e-15	-2.93099e-15
6	4	0	4	1.08802e-14	1.08802e-14
6	4	0	5	5.15143e-15	5.15143e-15
6	4	0	6	-1.42997e-14	-1.42997e-14
6	4	0	7	4.9738e-15	4.9738e-15
6	4	0	8	5.12923e-15	5.12923e-15
6	4	0	9	-1.27898e-14	-1.27898e-14
6	4	0	10	0	0
7	4	0	1	2.22045e-15	2.22045e-15
7	4	0	2	2.30926e-15	2.30926e-15
7	4	0	3	2.22045e-15	2.22045e-15
7	4	0	4	4.79616e-15	4.79616e-15
7	4	0	5	4.70735e-15	4.70735e-15
7	4	0	6	1.39999e-14	1.39999e-14
7	4	0	7	-7.10543e-15	-7.10543e-15
7	4	0	8	5.10703e-15	5.10703e-15
7	4	0	9	0	0
7	4	0	10	0	0
8	4	0	1	1.39444e-14	1.39444e-14
8	4	0	2	2.53131e-15	2.53131e-15
8	4	0	3	7.2331e-15	7.2331e-15
8	4	0	4	-1.23235e-14	-1.23235e-14
8	4	0	5	-2.66454e-15	-2.66454e-15
8	4	0	6	-9.99201e-15	-9.99201e-15
8	4	0	7	-9.4591e-15	-9.4591e-15
8	4	0	8	7.81597e-15	7.81597e-15
8	4	0	9	1.91847e-14	1.91847e-14
8	4	0	10	2.4869e-15	2.4869e-15
9	4	0	1	2.30926e-15	2.30926e-15
9	4	0	2	7.54952e-15	7.54952e-15
9	4	0	3	2.66454e-15	2.66454e-15
9	4	0	4	1.22569e-14	1.22569e-14
9	4	0	5	7.54952e-15	7.54952e-15
9	4	0	6	-2.57572e-15	-2.57572e-15
9	4	0	7	1.49214e-14	1.49214e-14
9	4	0	8	-7.4607e-15	-7.4607e-15
9	4	0	9	2.4869e-15	2.4869e-15
9	4	0	10	0	0
10	4	0	1	-5.86198e-15	-5.86198e-15
10	4	0	2	0	0
10	4	0	3	2.30926e-15	2.30926e-15
10	4	0	4	-2.70894e-15	-2.70894e-15
10	4	0	5	-2.66454e-15	-2.66454e-15
10	4	0	6	5.24025e-15	5.24025e-15
10	4	0	7	1.04805e-14	1.04805e-14
10	4	0	8	3.55271e-16	3.55271e-16
10	4	0	9	1.61648e-14	1.61648e-14
10	4	0	10	5.01821e-15	5.01821e-15
11	4	0	1	0	0
11	4	0	2	-2.81997e-15	-2.81997e-15
11	4	0	3	-1.01252e-14	-1.01252e-14
11	4	0	4	-2.75335e-15	-2.75335e-15
11	4	0	5	-5.32907e-15	-5.32907e-15
11	4	0	6	1.02585e-14	1.02585e-14
11	4	0	7	-1.56319e-14	-1.56319e-14
11	4	0	8	1.77636e-14	1.77636e-14
11	4	0	9	2.66454e-15	2.66454e-15
11	4	0	10	-5.50671e-15	-5.50671e-15
12	4	0	1	1.33227e-16	1.33227e-16
12	4	0	2	2.4869e-15	2.4869e-15
12	4	0	3	-7.28306e-15	-7.28306e-15
12	4	0	4	-7.10543e-15	-7.10543e-15
12	4	0	5	-1.42553e-14	-1.42553e-14
12	4	0	6	1.21014e-14	1.21014e-14
12	4	0	7	7.28306e-15	7.28306e-15
12	4	0	8	-1.3145e-14	-1.3145e-14
12	4	0	9	4.88498e-15	4.88498e-15
12	4	0	10	-2.4869e-15	-2.4869e-15
13	4	0	1	-1.87628e-14	-1.87628e-14
13	4	0	2	2.13163e-15	2.13163e-15
13	4	0	3	2.26485e-15	2.26485e-15
13	4	0	4	-8.34888e-15	-8.34888e-15
13	4	0	5	-7.81597e-15	-7.81597e-15
13	4	0	6	1.1724e-14	1.1724e-14
13	4	0	7	-3.93019e-15	-3.93019e-15
13	4	0	8	-4.16889e-15	-4.16889e-15
13	4	0	9	0	0
13	4	0	10	0	0
14	4	0	1	0	0
14	4	0	2	-8.32667e-17	-8.32667e-17
14	4	0	3	0	0
14	4	0	4	0	0
14	4	0	5	1.59872e-14	1.59872e-14
14	4	0	6	4.54887e-15	4.54887e-15
14	4	0	7	-2.4869e-15	-2.4869e-15
14	4	0	8	6.66134e-15	6.66134e-15
14	4	0	9	2.19269e-14	2.19269e-14
14	4	0	10	-4.52971e-15	-4.52971e-15
15	4	0	1	0	0
15	4	0	2	0	0
15	4	0	3	2.13163e-15	2.13163e-15
15	4	0	4	0	0
15	4	0	5	0	0
15	4	0	6	-2.13163e-15	-2.13163e-15
15	4	0	7	0	0
15	4	0	8	-8.65974e-15	-8.65974e-15
15	4	0	9	-4.13003e-15	-4.13003e-15
15	4	0	10	0	0
16	4	0	1	-1.2168e-14	-1.2168e-14
16	4	0	2	-1.20792e-14	-1.20792e-14
16	4	0	3	-1.27454e-14	-1.27454e-14
16	4	0	4	-4.9738e-15	-4.9738e-15
16	4	0	5	1.20792e-14	1.20792e-14
16	4	0	6	2.57572e-15	2.57572e-15
16	4	0	7	-1.26121e-14	-1.26121e-14
16	4	0	8	2.4869e-15	2.4869e-15
16	4	0	9	4.61853e-15	4.61853e-15
16	4	0	10	0	0
17	4	0	1	0	0
17	4	0	2	2.0961e-14	2.0961e-14
17	4	0	3	1.75859e-14	1.75859e-14
17	4	0	4	-3.90799e-15	-3.90799e-15
17	4	0	5	1.21236e-14	1.21236e-14
17	4	0	6	-4.61853e-15	-4.61853e-15
17	4	0	7	-4.44089e-15	-4.44089e-15
17	4	0	8	0	0
17	4	0	9	9.05942e-15	9.05942e-15
17	4	0	10	-1.42109e-14	-1.42109e-14
18	4	0	1	-1.65201e-14	-1.65201e-14
18	4	0	2	-4.88498e-15	-4.88498e-15
18	4	0	3	-5.24025e-15	-5.24025e-15
18	4	0	4	4.52971e-15	4.52971e-15
18	4	0	5	-1.36779e-14	-1.36779e-14
18	4	0	6	-1.73861e-14	-1.73861e-14
18	4	0	7	2.0739e-14	2.0739e-14
18	4	0	8	-2.66454e-15	-2.66454e-15
18	4	0	9	-1.48326e-14	-1.48326e-14
18	4	0	10	-2.84217e-15	-2.84217e-15
19	4	0	1	0	0
19	4	0	2	6.21725e-15	6.21725e-15
19	4	0	3	-1.24345e-14	-1.24345e-14
19	4	0	4	0	0
19	4	0	5	6.4837e-15	6.4837e-15
19	4	0	6	-6.75016e-15	-6.75016e-15
19	4	0	7	1.35003e-14	1.35003e-14
19	4	0	8	6.32827e-15	6.32827e-15
19	4	0	9	-3.41949e-15	-3.41949e-15
19	4	0	10	9.76996e-15	9.76996e-15
20	4	0	1	-4.70735e-15	-4.70735e-15
20	4	0	2	2.4869e-15	2.4869e-15
20	4	0	3	1.51879e-14	1.51879e-14
20	4	0	4	-2.13163e-15	-2.13163e-15
20	4	0	5	2.4869e-15	2.4869e-15
20	4	0	6	-1.42553e-14	-1.42553e-14
20	4	0	7	7.14984e-15	7.14984e-15
20	4	0	8	-1.18128e-14	-1.18128e-14
20	4	0	9	1.43885e-14	1.43885e-14
20	4	0	10	4.79616e-15	4.79616e-15
21	4	0	1	0	0
21	4	0	2	7.86038e-15	7.86038e-15
21	4	0	3	0	0
21	4	0	4	1.01252e-14	1.01252e-14
21	4	0	5	-4.88498e-15	-4.88498e-15
21	4	0	6	9.05942e-15	9.05942e-15
21	4	0	7	-1.55431e-14	-1.55431e-14
21	4	0	8	-7.63833e-15	-7.63833e-15
21	4	0	9	-1.40998e-14	-1.40998e-14
21	4	0	10	2.57572e-15	2.57572e-15
22	4	0	1	-2.89768e-15	-2.89768e-15
22	4	0	2	1.44551e-14	1.44551e-14
22	4	0	3	1.10134e-14	1.10134e-14
22	4	0	4	0	0
22	4	0	5	-8.08242e-15	-8.08242e-15
22	4	0	6	7.99361e-15	7.99361e-15
22	4	0	7	0	0
22	4	0	8	-1.10134e-14	-1.10134e-14
22	4	0	9	-6.75016e-15	-6.75016e-15
22	4	0	10	-9.23706e-15	-9.23706e-15
23	4	0	1	-2.93099e-15	-2.93099e-15
23	4	0	2	0	0
23	4	0	3	1.58984e-14	1.58984e-14
23	4	0	4	-8.34888e-15	-8.34888e-15
23	4	0	5	-8.17124e-15	-8.17124e-15
23	4	0	6	1.1191e-14	1.1191e-14
23	4	0	7	1.15463e-14	1.15463e-14
23	4	0	8	0	0
23	4	0	9	1.11466e-14	1.11466e-14
23	4	0	10	-6.03961e-15	-6.03961e-15
24	4	0	1	0	0
24	4	0	2	1.35003e-14	1.35003e-14
24	4	0	3	1.36779e-14	1.36779e-14
24	4	0	4	0	0
24	4	0	5	-2.4869e-15	-2.4869e-15
24	4	0	6	-7.81597e-15	-7.81597e-15
24	4	0	7	0	0
24	4	0	8	1.0747e-14	1.0747e-14
24	4	0	9	-5.32907e-15	-5.32907e-15
24	4	0	10	-2.84217e-15	-2.84217e-15
25	4	0	1	1.19904e-14	1.19904e-14
25	4	0	2	-1.22569e-14	-1.22569e-14
25	4	0	3	7.88258e-15	7.88258e-15
25	4	0	4	-1.1724e-14	-1.1724e-14
25	4	0	5	0	0
25	4	0	6	-6.75016e-15	-6.75016e-15
25	4	0	7	1.03029e-14	1.03029e-14
25	4	0	8	-7.72715e-15	-7.72715e-15
25	4	0	9	-1.1191e-14	-1.1191e-14
25	4	0	10	2.20268e-14	2.20268e-14
26	4	0	1	2.93099e-15	2.93099e-15
26	4	0	2	-1.32339e-14	-1.32339e-14
26	4	0	3	-2.66454e-15	-2.66454e-15
26	4	0	4	-8.18234e-15	-8.18234e-15
26	4	0	5	2.70894e-15	2.70894e-15
26	4	0	6	-9.9476e-15	-9.9476e-15
26	4	0	7	7.32747e-15	7.32747e-15
26	4	0	8	-7.99361e-15	-7.99361e-15
26	4	0	9	1.13243e-14	1.13243e-14
26	4	0	10	-8.17124e-15	-8.17124e-15
27	4	0	1	0	0
27	4	0	2	7.54952e-15	7.54952e-15
27	4	0	3	-1.74083e-14	-1.74083e-14
27	4	0	4	-1.02141e-14	-1.02141e-14
27	4	0	5	-1.00364e-14	-1.00364e-14
27	4	0	6	0	0
27	4	0	7	2.84217e-15	2.84217e-15
27	4	0	8	-2.4869e-15	-2.4869e-15
27	4	0	9	-1.06581e-14	-1.06581e-14
27	4	0	10	-5.32907e-15	-5.32907e-15
1	4	1	1	-0.481541	-6.36704
1	4	1	2	-0.868878	-15.4818
1	4	1	3	2.87267	-8.12629
1	4	1	4	-3.40031	-9.32509
1	4	1	5	-9.98487	-6.45487
1	4	1	6	-2	-7.46667
1	4	1	7	-1.16279	-2.32558
1	4	1	8	-2.05793	-3.70935
1	4	1	9	-3.28152	-7.88716
1	4	1	10	2.86678	3.70995
2	4	1	1	4.3956	-4.45665
2	4	1	2	-14.8649	-8.40841
2	4	1	3	6.14035	-6.72515
2	4	1	4	-3.42809	-3.56745
2	4	1	5	7.69231	-0.854701
2	4	1	6	-8.27338	-8.8729
2	4	1	7	3.50877	16.0819
2	4	1	8	-0.178253	9.62567
2	4	1	9	-17.0712	-17.4757
2	4	1	10	6.50624	2.49554
3	4	1	1	-4.56081	-5.40541
3	4	1	2	-1.5544	-4.14508
3	4	1	3	-2.97619	-2.51058e-13
3	4	1	4	-2.15589	-6.57822
3	4	1	5	-21.0019	-8.47784
3	4	1	6	0.524476	-11.4219
3	4	1	7	0.183824	0.796569
3	4	1	8	35.7143	7.32601
3	4	1	9	-4.30403	-5.37241
3	4	1	10	-3.25497	-13.5021
4	4	1	1	-4.38247	-4.71448
4	4	1	2	6.59341	-0.3663
4	4	1	3	-9.09091	-15.5844
4	4	1	4	3.05344	-12.5318
4	4	1	5	-3.52697	0.968188
4	4	1	6	-3.48399	-13.0571
4	4	1	7	5.92105	5.26316
4	4	1	8	-5.66038	-14.3955
4	4	1	9	-0.10352	-6.14217
4	4	1	10	-10.8187	-11.9558
5	4	1	1	9.26773	-3.89016
5	4	1	2	-19.7802	-5.12821
5	4	1	3	-6.82281	-7.33198
5	4	1	4	-1.94954	-5.19878
5	4	1	5	-26.1501	-6.37611
5	4	1	6	-5.50239	-8.69219
5	4	1	7	-12.037	-5.09259
5	4	1	8	-6.3981	1.10585
5	4	1	9	-22.7373	-13.5394
5	4	1	10	6.95876	5.6701
6	4	1	1	2.75689	-0.167084
6	4	1	2	3.4264	-0.169205
6	4	1	3	-0.641026	2.13675
6	4	1	4	2.13033	1.50376
6	4	1	5	-1.42518	-2.61283
6	4	1	6	2.06718	-5.68475
6	4	1	7	-0.118203	-2.67928
6	4	1	8	-11.0979	1.03421
6	4	1	9	1.0514	-4.98442
6	4	1	10	4.06404	-2.70936
7	4	1	1	4.03727	-6.48723
7	4	1	2	4.72279	1.98494
7	4	1	3	-8.57438	-8.74656
7	4	1	4	-7.67635	-9.05947
7	4	1	5	5.99572	-1.85582
7	4	1	6	-13.1356	-3.9548
7	4	1	7	-6.5762	5.08003
7	4	1	8	-0.115473	6.23557
7	4	1	9	-2.5	-2.66667
7	4	1	10	4.65116	-5.5673
8	4	1	1	-2.83613	-6.86275
8	4	1	2	6.00907	-0.604686
8	4	1	3	-0.7431	-1.9816
8	4	1	4	-3.42163	-3.97351
8	4	1	5	5.91133	2.62726
8	4	1	6	-4.9217	-20.2088
8	4	1	7	0.75431	-8.40517
8	4	1	8	6.79612	-5.74434
8	4	1	9	4.12148	-4.91685
8	4	1	10	-1.64835	-8.05861
9	4	1	1	-4.6841	-5.95497
9	4	1	2	0.555556	-2.96296
9	4	1	3	0.115741	-2.00617
9	4	1	4	3.93258	0.749064
9	4	1	5	-2.84091	-1.89394
9	4	1	6	-1.19048	2.38095
9	4	1	7	-0.900901	1.35135
9	4	1	8	-1.98238	-1.61527
9	4	1	9	-5.61798	-2.99625
9	4	1	10	1.49083	4.3578
10	4	1	1	1.70604	4.11199
10	4	1	2	1.6624	0.170503
10	4	1	3	2.21963	-6.54206
10	4	1	4	-5.74713	-6.89655
10	4	1	5	5.14019	-3.42679
10	4	1	6	2.68949	1.46699
10	4	1	7	6.45933	0.0797448
10	4	1	8	-5.33333	3.11111
10	4	1	9	-2.17391	-2.97907
10	4	1	10	-1.27021	-3.00231
11	4	1	1	1.15979	-1.6323
11	4	1	2	-0.510204	-3.48639
11	4	1	3	-4.84234	-7.28228
11	4	1	4	2.69953	2.89515
11	4	1	5	4.65116	-4.26357
11	4	1	6	-5.25114	-4.49011
11	4	1	7	1.16279	0.387597
11	4	1	8	-2.49433	-8.54119
11	4	1	9	0.225225	-5.03003
[truncated: 161 more rows]
